1    **Genetic networks underlying natural variation in basal and induced activity levels**  
2    **in *Drosophila melanogaster***

3

4    Louis P. Watanabe, Cameron Gordon, Mina Y. Momeni, and Nicole C. Riddle

5    The University of Alabama at Birmingham

6    Department of Biology

7    Birmingham, Alabama 35294

8

**Running Title:** Natural variation in activity levels

**Key Words:** Exercise, GWAS, DGRP2, Drosophila, REQS

**Corresponding Author:**

Nicole C. Riddle

1720 2nd Ave S

Birmingham, AL

35294

Phone: 205-975-4049

Email: [riddlenc@uab.edu](mailto:riddlenc@uab.edu)

## ABSTRACT

Exercise is recommended by health professionals across the globe as part of a healthy lifestyle to prevent and/or treat the consequences of obesity. While overall, the health benefits of exercise and an active lifestyle are well understood, very little is known about how genetics impacts an individual's inclination for and response to exercise. To address this knowledge gap, we investigated the genetic architecture underlying natural variation in activity levels in the model system *Drosophila melanogaster*. Activity levels were assayed in the Drosophila Genetics Reference Panel 2 fly strains at baseline and in response to a gentle exercise treatment using the Rotational Exercise Quantification System. We found significant, sex-dependent variation in both activity measures and identified over 100 genes that contribute to basal and induced exercise activity levels. This gene set was enriched for genes with functions in the central nervous system and in neuromuscular junctions and included several candidate genes with known activity phenotypes such as flightlessness or uncoordinated movement. Interestingly, there were also several chromatin proteins among the candidate genes, two of which were validated and shown to impact activity levels. Thus, the study described here reveals the complex genetic architecture controlling basal and exercise-induced activity levels in *D. melanogaster* and provides a resource for exercise biologists.

## INTRODUCTION

Obesity is a disease associated with significantly higher all-cause mortality relative to normal weight (CARMENKE *et al.* 2013; FLEGAL *et al.* 2013; MASTERS *et al.* 2013). This increase in mortality can be attributed largely to the elevated incidence of cardiovascular disease (EBBERT *et al.* 2014; MOLICA *et al.* 2015; SISNOWSKI *et al.* 2015), cancer (BERGER 2014; GARG *et al.* 2014; NAKAMURA *et al.* 2014; PARK *et al.* 2014), and diabetes (NOMURA *et al.* 2010; RIOBO SERVAN 2013; POLSKY AND ELLIS 2015) observed in obese individuals. The increasing prevalence of obesity is a serious international public health issue that has warranted action from legislators worldwide (HARTEMINK *et al.* 2006). The upswing in rates of the disease throughout the United States caused the national medical expenditure dedicated to treating obesity-related illnesses in adults to increase by 29% between 2001 and 2015 (BIENER *et al.* 2018). Therefore, strategies to counter the broadening obesity epidemic are needed to ensure the medical and financial wellbeing of society at large.

Exercise is among the most common treatments for obesity, which also include surgical procedures, medications, and other lifestyle modifications (BARETIC 2013; WYATT 2013; KUSHNER 2014; MARTIN *et al.* 2015). Given the relatively risk-free nature of exercise as a method of weight loss compared with many other treatment options, it is considered widely to be an essential component of treatment regimes for obesity (MCQUEEN 2009; LASKOWSKI 2012; FONSECA-JUNIOR *et al.* 2013). In addition to treating obesity, exercise imparts a number of health benefits including improved muscle function (ANDERSEN *et al.* 2015; COEN *et al.* 2015; KIM *et al.* 2015) and cartilage integrity (TONEVITSKY *et al.* 2013;

BREIT *et al.* 2015; BLAZEK *et al.* 2016), increased insulin sensitivity (MITROU *et al.* 2013; BROCKLEBANK *et al.* 2015), and prevention of many chronic conditions (BOOTH *et al.* 2012). These benefits led exercise to be recognized as an important facet of a healthy lifestyle, with government agencies such as the U.S. Department of Health and Human Services issuing specific exercise recommendations for adults, youths, and children (e.g. adults should do at least 150 minutes of moderate-intensity, or 75 minutes of vigorous-intensity aerobic activity per week) (DHHS 2008). Thus, exercise is an important component of many people's lives, whether to treat obesity or to improve overall health.

Despite the growing relevance of exercise, there is a lack of clarity concerning a number of factors that influence its physiological effects (KAROLY *et al.* 2012), most notably genetic background. Although exercise has gained considerable popularity as both a lifestyle choice and a treatment for obesity, there are large differences in how individuals respond to exercise, and it is not universally effective (KEITH *et al.* 2006; McALLISTER *et al.* 2009). In fact, exercise provides no metabolic improvements to certain individuals (BOUCHARD *et al.* 1999; BOUCHARD *et al.* 2011; STEPHENS AND SPARKS 2015), revealing an extreme disparity in exercise response that can likely be accounted for, at least in part, by genetic variation. Moreover, existing data suggest a relationship between exercise-induced improvements to muscle metabolism and exercise performance in humans (LAREW *et al.* 2003). Thus, while some genes have been identified as contributors to physical activity traits of an individual (STUBBE *et al.* 2006; DE GEUS *et al.* 2014), the genetic architecture controlling exercise responses has yet to be characterized.

As an emerging model organism for exercise studies, *Drosophila melanogaster* possesses several characteristics advantageous for elucidating the relevant genetic architecture (PIAZZA *et al.* 2009; TINKERHESS *et al.* 2012; SUJKOWSKI *et al.* 2015; MENDEZ *et al.* 2016; WATANABE AND RIDDLE 2017). Traditional obstacles for exercise studies, including difficulties in controlling for essential variables such as age, sex, fitness, and diet, can be addressed using *D. melanogaster*. Furthermore, *Drosophila* is an established model system with a well-characterized genome and ample tools for genetic studies. These tools include the *Drosophila* Genetics Reference Panel 2 (DGRP2), a fully sequenced population of 200 genetically diverse isogenic lines for quantitative genetic studies (MACKAY *et al.* 2012; HUANG *et al.* 2014), in addition to large collections of mutants and RNAi knockdown lines. Furthermore, a high degree of genetic (SCHNEIDER 2000) and functional (HEWITT AND WHITWORTH 2017) conservation exists between *Drosophila* and humans, particularly in areas such as energy-related pathways (EDISON *et al.* 2016) and disease genes (PANDEY AND NICHOLS 2011; UGUR *et al.* 2016), which often allows findings from *Drosophila* to be translated to mammalian model systems. Together, these features make *Drosophila* an excellent choice for studies of exercise genetics.

Several innovative studies demonstrate that exercise treatments of *Drosophila* produce significant physiological and behavioral responses, including increased lifespan and improved climbing ability (PIAZZA *et al.* 2009; TINKERHESS *et al.* 2012; SUJKOWSKI *et al.* 2015; MENDEZ *et al.* 2016; WATANABE AND RIDDLE 2017). For example, treatments with

the Power Tower, which prompts exercise by exploiting the negative geotaxis of *Drosophila* by repeatedly dropping their enclosures, causing the animals to fall to the base and attempt another climb, improves mobility in aging animals (PIAZZA *et al.* 2009). The TreadWheel exploits negative geotaxis through slow rotation of fly enclosures to stimulate a response; responses to prolonged exercise on the TreadWheel include, for example, changes in triglyceride and glycogen levels in the animals (MENDEZ *et al.* 2016). The Rotating Exercise Quantification System (REQS) is an offshoot of the TreadWheel, which is able to record the activity levels of flies as they exercise, facilitating the comparison of different exercise regimes and allowing for the normalization of exercise levels (WATANABE AND RIDDLE 2017). The REQs validation study also demonstrated that there is significant variability among different *Drosophila* genotypes in how they respond to the rotational exercise stimulation (WATANABE AND RIDDLE 2017), suggesting that genetic factors contribute to the difference in exercise levels observed.

In this study, we investigate the genetic factors contributing to the level of exercise induced through rotational stimulation. Using the REQs, we measured basal activity levels (without rotation) as well as induced exercise levels (with rotation) in 161 genetically diverse strains from the DGRP2. Next, we used a genome-wide association study (GWAS) to identify the genetic variants responsible for the approximately 10-fold variation in activity levels observed within the DGRP2 lines. We identified over 100 annotated genes that contribute to basal and induced activity levels. The loci that control activity levels are different for the untreated and exercise-treated conditions and

often also differ between males and females. Additional characterization of candidate genes validate the results of our GWAS and confirm that genes with functions in the central nervous system as well as some chromatin proteins impact *Drosophila* activity levels. Together, our findings provide key insights into the number and types of genetic factors that control basal and exercise-induced activity levels, provide an array of candidate genes for follow-up studies, and identify chromatin modifiers as a new class of proteins linked to exercise.



# MATERIALS AND METHODS

## Drosophila Lines and Husbandry

The DGRP2 fly lines used in this study were obtained from the Bloomington Drosophila Stock Center or from our collaborator Dr. Laura Reed (University of Alabama). Fly lines for the follow-up analysis of candidate genes (Supplemental Table S1) were obtained from the Bloomington Drosophila Stock Center. Drosophila were grown on media consisting of a cornmeal-molasses base with the addition of Tegosept, propionic acid, agar, yeast, and Drosophila culture netting (MENDEZ *et al.* 2016). All flies used for the assays were reared in an incubator at 25°C and ~70% humidity with a 12-hour light-dark cycle for a minimum of three generations prior to the start of the experiments. To minimize density effects, animals were grown in vials established by mating seven male to ten female flies for each line. The resulting progeny were collected as virgins, aged 3-7 days, separated by sex, and then used for the exercise experiments.

## Exercise Quantification Assay

Basal and induced exercise activity levels were determined for a total of 161 strains (155 basal and 151 induced) from the DGRP2 using the REQS (MACKAY *et al.* 2012; HUANG *et al.* 2014; WATANABE AND RIDDLE 2017; WATANABE AND RIDDLE 2018) (Supplemental Table S2). For each DGRP2 line, 100 male and 100 female virgin flies aged 3-7 days were used. The animals were anesthetized with CO<sub>2</sub>, divided into groups of 10 (n=10 groups per sex per line), and loaded into the vials of the REQS at 9AM [for additional details see (WATANABE AND RIDDLE 2018)]. The REQS was moved into the incubator at 10AM, and the vials were rotated to a vertical orientation similar to

how flies are reared in a laboratory setting. The animals were allowed to recover from anesthetization for one hour. The basal activity level of the animals was measured from 11AM to 12PM, keeping the REQS in a static position without rotation. At 12PM, the REQS' rotational feature was turned on at 4 rotations per minute (rpm) to induce exercise in the animals, and activity levels were monitored during this exercise until 2PM. Measurements were taken at five-minute intervals during both the basal and induced activity phases.

## Statistics

Basal and induced activity levels were calculated as the average activity level per five-minute interval of each vial/genotype/sex combination. A GLM (general linear model with gamma log-link) to investigate the impact of the factors vial, genotype, sex, and treatment on activity levels was performed using SAS9.4 software (INC 2013). As the initial analysis showed no effect of "vial", "vial" was removed from the final model. Descriptive statistics were generated in SPSS25 (IBM 2017) and R (R DEVELOPMENT CORE TEAM 2018). Custom Perl scripts were used for the SNP classification analysis in addition to R (R DEVELOPMENT CORE TEAM 2018).

## Genome Wide Association Study (GWAS)

Basal and induced activity levels were separately analyzed by calculating the average activity level per five-minute interval of each genotype/sex combination. These phenotypic values (Supplemental Table S3) were used for two separate GWASs using the DGRP2 webtool (<http://dgrp2.gnets.ncsu.edu/>) developed by Dr. Trudy Mackay

(MACKAY *et al.* 2012; HUANG *et al.* 2014). Genetic variants that met a significance threshold of  $p < 10^{-5}$  in any of the analyses (mixed model, simple regression model, female data, male data, combined data, and sex difference analysis) were considered candidate loci (Supplemental Table S4). Candidate genes for follow-up and validation were selected based on significance level, mutant availability from Drosophila stock centers, and reports on FlyBase (GRAMATES *et al.* 2017) consistent with phenotypes that might be linked to exercise/activity.

## Gene Ontology (GO)

GO analysis was performed on the genes associated with the genetic variants that met the significance threshold of  $p < 10^{-5}$  separately for both the basal and induced GWAS results. Genetic variants lacking association with a specific gene were removed from the list, and duplicate genes were removed as well. FlyBase gene IDs were retrieved for the gene sets using The Database for Annotation, Visualization and Integrated Discovery (DAVID) ID conversion function (HUANG DA *et al.* 2009b; HUANG DA *et al.* 2009a). GO analysis was carried out using PANTHER (Protein Analysis Through Evolutionary Relationships) (MI *et al.* 2013; MI *et al.* 2017). The “biological process” and “cellular component” enrichment terms were used.

## Functional analysis of candidate genes

Candidate genes were selected for follow-up experiments based on their  $p$ -values in the GWASs, as well as based on the annotation available on FlyBase. For knockdown of *Su(z)2* and *Jarid2*, UAS-controlled RNAi constructs ( $y^1$  *sc\* v<sup>1</sup> sev<sup>2</sup>*;  $P\{y[+t7.7]$

$v[+t1.8]=TRiP.HMS00281}attP2/TM3, Sb^1$  for  $Su(z)2$  [Bloomington stock 33403];  $y^1 sc^*$   
 $v^1$ ;  $P\{y[+t7.7] v[+t1.8]=TRiP.HMS00679}attP2$  for  $Jarid2$  [Bloomington stock 32891])  
were combined with a muscle-specific or central nervous system specific driver (muscle:  
 $P\{w[+mC]=UAS-Dcr-2.D\}1, w^{1118}$ ;  $P\{w[+mC]=GAL4-Mef2.R\}R1$  [Bloomington stock  
25756]; central nervous system:  $P\{w[+mW.hs]=GawB\}elav[C155] w^{1118}$ ;  
 $P\{w[+mC]=UAS-Dcr-2.D\}2$  [Bloomington stock 25750]) (PERKINS *et al.* 2015). Offspring  
from these crosses carrying the UAS construct as well as the GAL4 driver were  
collected and aged 3-5 days prior to the start of the experiment. Basal and exercise-  
induced activity levels were measured as described above, with the following  
modification: Activity measures were collected both in the morning (10AM-1PM) and  
afternoon (4PM-7PM), with time used as a blocking factor.

## Data availability

All data necessary for confirming the conclusions of this article are represented fully  
within the article and its tables, figures, and supplemental files, with the exception of the  
genotype data for the DGRP2 population and the GWAS model. This information can  
be found at <http://dgrp2.gnets.ncsu.edu/>.

## RESULTS

### **The DGRP2 shows extensive variation in basal and exercise-induced activity levels.**

To investigate the genetic basis of variation in activity levels, both basal and exercise induced, we focused on the DGRP2 collection of *Drosophila* strains. The DGRP2 is a collection of 200 inbred lines of *Drosophila* derived from wild-caught females, representing genetic variation that is present in a natural population. To measure activity levels, we used the REQS, as it allowed us to record basal activity of the animals without rotation and induced activity levels during rotation. The rotation induces exercise (higher activity levels) through the animals' negative geotaxis response. Using 161 strains from the DGRP2, we measured basal activity of the animals as well as the activity during rotationally-induced exercise in a single experiment (Figure 1). The output from the REQS is the average activity level per 10 flies per five-minute interval, which was estimated based on a one-hour recording for the basal activity and a two-hour recording for the exercise activity.

Figure 2 shows the results from this set of experiments, with data from females (A+B) and males (C+D) shown separately (see also Figure S1). All activity measures described are given as crossings/five minutes/fly. We found a wide range of average activity levels for both basal and exercise-induced activity. The highest level of basal activity in males was found in line 57, which exhibited 144.5 +/- 9.4 activity units (mean +/- SEM), while for females line 595 had the highest basal activity with 58.55 activity units (+/- 3.9). The highest performing line was the same for exercise-induced activity in

both sexes, line 808 with an average of 155.25 activity units ( $\pm$  3.56) in males and an average of 133.94 activity units ( $\pm$  3.60) in females. Interestingly, for males the lowest basal and induced activity levels were measured both in line 383 with 0.275 activity units ( $\pm$  0.1) for basal activity and 1.63 activity units ( $\pm$  0.79) for exercise-induced activity. The low performer in the females was different between basal and induced activity: Line 390 females had the lowest basal activity with 0.53 activity units ( $\pm$  0.14), while line 32 with an average of 1.22 activity units ( $\pm$  0.26) had the lowest exercise-induced activity level. Looking across all factors, the variation in mean activity levels illustrated in Figure 2 range from a low of 0.275  $\pm$  0.1 activity units (line 383, basal males) to a high of 155.25  $\pm$  3.56 activity units (line 808, induced males). Thus, our highest activity measurement showed an approximately 500-fold increase from the lowest measurement, demonstrating that there is extensive variation in animal activity based on genotype, sex, and treatment within the DGRP2 population.

Several general trends can be discerned from the bar graphs in Figure 2: 1) Across the 161 lines, female flies tend to have a lower basal activity level than males (compare A to C); 2) rotational stimulation tends to increase activity levels (compare A to B and C to D), and 3) while basal activity levels tend to be lower in females, exercise activity levels tend to be more similar between the sexes (compare A and C to B and D). However, there are exceptions to these general trends. For example when comparing male to female activity, of the 155 basal lines measured, 27 lines displayed significantly higher activity levels in males, but there is one genotype (line 83) which exhibited higher activity levels in females (40.35 female activity, 4.87 male activity,  $p=0.044$ ). Similarly,

for the induced activity levels, 12 lines showed significantly greater activity in males than in females, while there was one line that showed the opposite trend, higher activity levels in females than in males (line 796, 122.01 female activity, 75.6 male activity,  $p < 0.001$ ). When observing the effects of exercise, as expected 41 genotypes demonstrated significantly increased activity with only three lines showing decreased activity. Thus, most genotypes showed increased activity when rotated, and males exhibited higher activity levels than females.

### **Exercise-induced activity measures are strongly correlated between males and females of the same genotype.**

While the graphs presented in Figure 2 provide an assessment of the variability in activity phenotypes among the DGRP2 strains, they do not reveal how activity levels between males and females of the same strain relate to each other, nor do they reveal the relationship between basal and exercise-induced activity levels within the same strain/sex. To address these questions, we used scatter plots and determined the correlations of activity measures between males and females of the same strain, as well as the correlations between basal and exercise-induced activity separately for both sexes (Figure 3). We find that the Pearson correlation coefficient between male and female measures for basal activity levels is 0.32 ( $p < 0.01$ ), indicating a weak positive relationship (Figure 3A). The correlation between male and female measures for induced exercise is 0.831 ( $p < 0.01$ ), suggesting a strong relationship between the two measures (Figure 3B). When we examine the relationship between basal and exercise-induced activity levels, we find that in females, there is a moderately strong positive

relationship between the two measures (Pearson correlation coefficient 0.512,  $p < 0.01$ ; Figure 3C). In males, the correlation between basal and exercised-induced activity is somewhat weaker, with a Pearson correlation coefficient of 0.350 ( $p < 0.01$ ; Figure 3D). These results suggest that all measures show some degree of positive correlation. The strongest correlation is seen among both sexes for the exercise-induced activity phenotype, possibly reflecting the fact that this measure is most strongly impacted by the animals' overall physical abilities.

Because the DGRP2 strains have been used to investigate a wide range of phenotypes by the *Drosophila* research community, we were able to also look at the connection between animal activity levels and lifespan. Generally, it is thought that a more active lifestyle and overall higher activity levels lead to a healthier and longer life (REIMERS *et al.* 2012). Surprisingly, in the DGRP2 strains, we find no correlation between the basal activity levels of the animals measured by the REQS and the lifespan reported by Durham and colleagues [Pearson's correlation: 0.029;  $p = 0.7417$ ; Figure S2A; (DURHAM *et al.* 2014)]. Similarly, if we examine the relationship between exercise-induced activity levels and lifespan, there is no significant correlation (Pearson's correlation: -0.136;  $p = 0.1245$ ; Figure S2B). This lack of relationship between activity levels and lifespan is unexpected and deserves further investigation.

### **Sex, genotype, and exercise treatment impact activity.**

Next, we investigated the factors influencing the variation in activity levels we observed in Figure 2 utilizing a general linear model (GLM) analysis. Specifically, the GLM



examined the impact of treatment (with or without rotation), sex, genotype, as well as the interactions between these factors. The results indicate that activity levels were significantly impacted by treatment, illustrating that rotation indeed is able to increase activity levels above baseline in this genetically diverse population of fly strains ( $p < 0.001$ , Table 1). In addition, sex and genotype significantly impacted activity levels, as suggested by the descriptive data illustrated in Figures 2 and S1 ( $p < 0.001$ ). Interaction effects between treatment, sex, and genotype also impacted the activity levels measured by the REQS, indicating that to be able to predict activity phenotypes, sex, treatment, and genotype must all be considered together (Table 1). The descriptive statistics combined with the GLM analysis thus indicate that for the activity phenotype there is tremendous variation between the DGRP2 lines, some of which is due to genetics (genotype effect). This finding suggested that individual genes underlying the variation in activity levels might be identified by a GWAS.

### **GWAS identifies over 400 genetic variants impacting activity levels.**

To identify the genetic factors impacting basal and exercise-induced activity levels in the DGRP2 population, we carried out a GWAS. The analysis was run separately for the basal and exercise-induced activity levels (155 and 151 lines respectively) using the DGRP2 GWAS Webtool (<http://dgrp2.gnets.ncsu.edu/>). The webtool uses two different models for the analysis: a simple regression model and a more complex mixed model. The analysis is carried out for male data only, female data only, combined data from both sexes, and for the difference between sexes. Together, this set of GWASs identified over 400 genetic variants [single nucleotide polymorphisms (SNPs), multiple

nucleotide polymorphisms (MNPs), and deletions (DEL)] that impact basal and exercise-induced activity levels ( $p < 0.005$ ; Figures 4 and S3, Tables 2 and S4), illustrating the importance of genetic factors for exercise phenotypes.

The genomic variants identified by the GWAS are distributed throughout the genome, and with the exception of the small 4<sup>th</sup> chromosome, all chromosome arms contain genetic variants contributing to the basal and induced exercise activity phenotypes (Table S4). Comparing the chromosomal distribution of the genetic variants identified as significant in the basal activity or induced exercise activity analysis to that of the overall distribution of variants using chi-square analysis, we found no significant deviations from the expectation, indicating that the variants are not clustered in any particular way in the genome. However, there are small areas of linkage disequilibrium, where significant variants are clustered on chromosomes 2L and 3L (basal analysis) and chromosomes 2R, 3R, and 3L (induced analysis; Figure S4). Overall, the results of this GWAS demonstrate that a large number of loci contribute to the two activity phenotypes measured and that the genetic architecture underlying the phenotypes is complex.

### **Basal activity variant distributions differ significantly from genome-wide set.**

Next, we investigated what types of genetic variants were identified as significant in the GWAS. In order to compare the classifications of the variants from the basal and induced analyses to the entire genome, the variants from the induced and basal activity were first characterized based on their genomic context (introns, exons, upstream,

downstream, UTR, and unknown). We then compared the classification distributions from the basal and induced analyses to a genome-wide set using a chi-square test. We found that only the basal activity variant distributions were significantly different from the genome-wide set ( $p=5.413 \times 10^{-7}$ ) with a greater number of exons, upstream, and unknown elements (Figure 5). The classification for the variants contributing to induced exercise activity were not significantly different from the genome-wide classification of variants, possibly due to the smaller number of variants detected in this analysis and a concomitant reduced power to detect differences. Thus, the GWASs carried out here identify a diverse set of genetic variants as contributing to the activity phenotypes under study, and the overrepresentation of exon variants in the basal activity analysis suggests that these variants might indeed present genes important for animal activity and exercise.

### **Genetic variants impacting activity levels differ between males and females.**

The genetic variants identified as significantly associated with the two activity phenotypes differed between the analyses, some linked to activity in the males, some linked to activity in females, and some variants linked to the difference in activity levels between males and females. While the separate analyses of both male and female data lead to the identification of genetic variants, more genetic variants were identified in males than in females, and the combined analysis recovered more variants identified in males than in females. For example, the mixed model analysis of basal activity levels identified 53 genetic variants in females, 93 genetic variants in the males, and in the combined analysis, 46 variants are identified as significant, 22 of which overlap with the

variants identified using the male data, while only one variant also occurs in the female analysis ( $p < 5 \times 10^{-5}$ ). These results illustrate the importance of collecting data in both sexes, as the genetic factors contributing to both basal and induced exercise activity levels differ between males and females. The results also suggest that the difference between males and females is under genetic control.

### **GWAS discovers positive and negative effect variants impacting activity levels.**

The genetic variants identified as significantly associated with basal and/or induced exercise activity include loci with positive and negative effects on the phenotype. In the analysis of the induced exercise activity data, only genetic variants with negative impacts on activity levels were identified in either sex. Examining the data for basal activity, in males, the majority of variants negatively impacted basal activity, and only 1.5% of variants (three out of 195; mixed model) increased activity levels. These rare genetic variants leading to increased activity levels were associated with the genes *bdg* and *s/o*. In females, the results are similar, with the majority of variants (63; mixed model) impacting basal activity levels negatively and positive effect variants being rare (three variants associated with *CG32521* and *CG8420*). Overall we found that the vast majority of our discovered variants resulted in a negative effect on activity.

### **Terms related to the central nervous system and muscle function are over-represented in the GO analysis.**

Next, we focused on the genetic variants identified in the GWAS as significant that were associated with genes and asked what types of genes contributed to the basal and

induced activity phenotypes (146 genes for basal activity; 47 genes for induced exercise activity). To do so, we explored the gene ontology (GO) terms associated with the gene sets linked to basal and induced activity levels. In order to determine which gene classes were over- or under-represented, GO analysis was carried out using the PANTHER (Protein Analysis Through Evolutionary Relationships) tools (Mi *et al.* 2013; Mi *et al.* 2017). Specifically, enrichment analysis was used to identify biological processes, cellular components, or molecular functions over-represented within the GWAS gene set relative to the genome as a whole.

For the GO term enrichment analysis for the genes contributing to basal activity levels, 30 GO terms were identified in the “biological process” category and 17 in the “cellular component” category. Among the “biological process” and “cellular component” GO terms, the largest fold enrichments were seen for two terms related to neurons, “axonal growth cone” (26.24-fold enrichment;  $p=3.3 \times 10^{-4}$ ) and “neuron recognition” (7.51-fold enrichment,  $p=5.79 \times 10^{-5}$ ) (Figure 6). Other significantly enriched GO terms include “neuromuscular junction”, “synaptic transmission”, and “behavior” (Figure 6). The GO term enrichment analysis of the gene set associated with exercise-induced activity identified a 27-fold enrichment for genes involved in the Alzheimer disease-presenilin pathway ( $p=2.01 \times 10^{-4}$ ). Thus, the GO term enrichment analysis identifies a variety of terms associated with neuronal function and behavior as characterizing the gene set involved in controlling basal and exercise-induced activity levels.

# **Candidate gene analyses support the GWAS results and suggest that the chromatin proteins SU(Z)2 and JARID2 impact animal activity.**

In order to assess the success of the GWAS analysis, we surveyed the information available on FlyBase (GRAMATES *et al.* 2017) to determine if altered activity phenotypes have been described associated with the candidate genes identified here. Mutants in 25 of the candidate genes have been described as either “flightless”, or “flight defective” on FlyBase (GRAMATES *et al.* 2017), five were described as “uncoordinated,” and one (*Cir1*) was described as “hyperactive” and “sleep defective” (VAN DER VOET *et al.* 2015). In our follow-up studies, we focus on two proteins involved in *polycomb* mediated gene regulation, *Su(z)2*, a member of the Polycomb Repressive Complex 1 [PRC1] (WU AND HOWE 1995; LO *et al.* 2009; NGUYEN *et al.* 2017), and *Jarid2*, a Jumonji C domain-containing lysine demethylase associated with the Polycomb Repressive Complex 2 [PRC2] (SASAI *et al.* 2007; HERZ *et al.* 2012).

To investigate a potential link between *Su(z)2*, *Jarid2* and animal activity, we utilized the UAS/GAL4 system to knockdown the activity of the two proteins (PERKINS *et al.* 2015). As complete loss of both *Su(z)2* and *Jarid2* is lethal (KALISCH AND RASMUSON 1974; SASAI *et al.* 2007; SHALABY *et al.* 2017), we chose to explore knockdown in two tissues: Muscle, achieved by the *Mef2.R-GAL4* driver, which is expressed in somatic, visceral and cardiac muscle (RANGANAYAKULU *et al.* 1998); and neuronal tissues, achieved by the *elav<sup>C155</sup>-GAL4* driver, which is expressed in neurons starting at embryonic stage 12 (LIN AND GOODMAN 1994). Because the knockdown with the *elav<sup>C155</sup>-GAL4* driver showed more impact in our hands, we focus on these data here. When animals lacking

*Su(z)2* transcript in neurons are compared to their parents, either carrying the UAS-driven *Su(z)2* RNAi construct or the *elav<sup>C155</sup>-GAL4* driver, the animals with reduced *Su(z)2* transcript levels show significantly increased basal activity levels (Wilcoxon rank sum test,  $p=0.002797$  for F1 compared to UAS parent,  $p=6.274e-06$  for GAL4 parent). They also show significantly increased exercise-induced activity (Wilcoxon rank sum test,  $p=2.601e-07$  for F1 compared to UAS parent,  $p=1.697e-05$  for GAL4 parent), and the increase in activity is consistent in both for males and females (Figure 7). For *Jarid2*, we observe a similar increase in activity: if *Jarid2* is removed in neuronal tissues, the animals show increased basal activity compared to their parents (UAS and GAL4 lines; Wilcoxon rank sum test,  $p=0.03412$  for F1 compared to GAL4 parent,  $p=3.72e-06$  for F1 compared to UAS parent). Exercised-induced activity is increased as well (Wilcoxon rank sum test,  $p=0.02587$  for F1 compared to GAL4 parent,  $p=0.03752$  for F1 compared to UAS parent). Together, these results indicate that our GWASs correctly identified *Su(z)2* and *Jarid2* as contributing to animal activity levels, both basal and exercise-induced.

## DISCUSSION

As exercise is widely recommended as part of a healthy lifestyle and as a treatment for obesity, we explored the contribution of genetic variation to exercise in *Drosophila* using the DGRP2 strain collection. We found extensive variation in activity levels in this population, both basal and exercise-induced, which was dependent on genotype and sex. The GWASs identified over 300 genetic variants and more than 150 genes that contributed to the basal and exercise-induced activity phenotypes. Some of these genes had previously been associated with exercise performance or activity. This group of genes includes *couch potato* [*cpo*], an RNA-binding, nuclear protein expressed in the central nervous system that is essential for normal flight behavior (BELLEN *et al.* 1992; GLASSCOCK AND TANOUYE 2005; SCHMIDT *et al.* 2008). *nervous wreck* [*nwk*] encodes a very different kind of protein than *cpo*, but it also has been shown previously to impact animal activity: mutants in this FCH and SH3 domain-containing adaptor protein show paralysis due to problems at the synapse of neuromuscular junctions (COYLE *et al.* 2004; RODAL *et al.* 2008). Another gene in this group is *bedraggled* [*bdg*], which encodes a putative neurotransmitter transporter, and null mutants of which are described as flightless and uncoordinated (RAWLS *et al.* 2007). The importance of the factors identified in our study is further underscored by the GO terms enrichment analysis, which revealed terms associated with the functions of the central nervous system and its interaction with the musculature. Together, these findings illustrate that the GWAS described here was successful in detecting variants associated with factors involved in the control of animal activity levels and behavior.



In addition to the genes such as *cpo*, *nwk*, and *bdg*, that would have been expected to impact basal activity or geotaxis-induced exercise activity, others candidate genes represent pathways with no clear link to animal activity or behavior. For example, variants in several chromatin proteins were identified as impacting animal activity levels, including SmydA-9, a SET domain protein, Su(z)2, a Polycomb group protein related to PSC, Jarid2, a Jumonji domain protein that interacts with PRC2, and Wde, an essential co-factor of the H3K9 methyltransferase Egg. In addition, several sperm proteins were identified as linked to activity (e. g. S-Lap8n, Sfp36F, Sfp51E) as were several members of the immunoglobulin superfamily (e. g. Side-II, CG31814, CG13506), but how they might contribute to an activity phenotype is unclear. As several of these genes are among a total of 36 genes identified here that were identified also by Schnorrer and colleagues as essential for normal muscle development (SCHNORRER *et al.* 2010), it is likely they represent novel pathways linked to activity. Because it includes both unexpected and expected gene classes, the gene set identified here as contributing to both basal and exercise-induced activity levels provides a rich resource for researchers interested in using *Drosophila* as a tool for the study of exercise.

Our study also revealed that there were significant differences in the genes contributing to activity levels in males and in females, and that several genes could be identified that were responsible for the difference between the sexes. This finding was surprising, as we anticipated that the basic metabolic and sensory pathways involved in the control of animal activity would be conserved between males and females. Mackay and colleagues in 2012 discovered significant differences in the gene networks controlling

starvation response and chill coma recovery time, but not startle response, and for all three traits, a large portion of the genetic variants that are identified in one sex show no significant association with the trait in the other sex (OBER *et al.* 2012). Garlapow and colleagues also found strong sex-specific differences in the factors controlling food intake in the DGRP2 population (GARLAPOW *et al.* 2015), and Morozova and colleagues detected sex differences in the networks controlling alcohol sensitivity (FOCHLER *et al.* 2017). These findings suggest that for many “basic” traits such as animal activity, sex specific differences in the underlying genetic networks occur frequently, highlighting the importance of studying both sexes.

When the list of candidate genes identified here is compared with those uncovered in other studies of activity traits, substantial overlap can be seen. For example, Jordan and colleagues investigated the genetic basis of the startle response and negative geotaxis in the DGRP2 population using a GWAS (JORDAN *et al.* 2012). They identified approximately 200 genes associated with each of these activity phenotypes, a number of genes similar to that identified in our study. As our exercise system relies on negative geotaxis, not surprisingly, 24 genes identified by Jordan and colleagues were identified also in the basal activity analysis presented here, and an additional 17 genes from the exercise induced activity analysis overlapped with the gene set identified by Jordan and colleagues. Five genes were identified as candidates in all three analyses (*CG15630*, *CG33144*, *ed*, *nmo*, and *SKIP*) (JORDAN *et al.* 2012). The overlap seen between the candidate genes identified in the two studies indicates that despite the different activity traits measured shared pathways exist.

544  
545 Interestingly, a second activity study utilizing the DGRP2 identified a completely  
546 independent set of candidate genes, showing no overlap with the genes identified here.  
547 The study by Rhode and colleagues used video-tracking to monitor the activity of male  
548 *Drosophila* from the DGRP2 in a shallow petri dish by measuring distance traveled in a  
549 5-minute interval (ROHDE *et al.* 2018). This “2D” activity study focused on specific  
550 groups of genes linked to their phenotype, specifically genes involved in  
551 transmembrane transport. While this study used a very different algorithm to identify  
552 candidate genes, even when their phenotypic measures are analyzed with the standard  
553 GWAS tool our study used, we find no overlap in the candidate gene sets identified.  
554 This lack of overlap in candidate genes identified by two activity studies illustrates the  
555 complexity in the pathways that impact basic animal behaviors such as activity. Given  
556 current understanding, genes from basic energy metabolism pathways to genes  
557 controlling the development of muscles and sensory organs to genes impacting the  
558 processing of sensory information are all involved in controlling activity levels. Thus, it  
559 is not surprising that studies using different activity types will identify distinct sets of  
560 candidate genes; rather, these findings highlight that additional innovative studies are  
561 needed to come to a comprehensive understanding of the genes involved in animal  
562 activity, both basal and in response to stimulation.

563  
564 The analysis of candidate genes presented here demonstrates that the REQS can be  
565 used successfully to identify genes involved in controlling basal and exercise induced  
566 activity levels in the DGRP2. Many of the candidate genes identified show relatively

small impacts in the DGRP2, likely due to the presence of weak, not null alleles in this wild-derived population. This likelihood is especially high for genes where the null alleles are described as flightless, as such mutants are unlikely to survive outside the laboratory. Interestingly, while most of the candidate genes identified are sex-specific, sex dependencies are typically not described for flightless or flight defective alleles listed on Flybase. This observation suggests that sex differences in activity patterns and responses to stimuli might be negligible for strong or null alleles, but do become relevant for alleles with more subtle impacts and thus affect the ability to detect significant associations with a phenotype in GWASs.

The assays using *Jarid2* and *Suz(2)* knockdown suggest that these chromatin modifiers might indeed play a role in controlling exercise activity levels, and possibly exercise response. While to date, neither *Jarid2* nor *Su(z)2* have been linked directly to animal activity, there are additional data that support this finding. Several alleles of *Su(z)2* were reported that result in climbing defects or even climbing inability due to malformation of the adhesive pads on the legs of the animals (HUSKEN *et al.* 2015). Thus, it is possible that other natural alleles exist that modify the ability of the animals to climb slippery surfaces such as those encountered in laboratory culture and assay vials. In addition, the transcription factor Mef2, which is responsible for normal muscle development (TAYLOR AND HUGHES 2017), appears to be impacted by changes in *Jarid2*: it is downregulated significantly in *Jarid2* mutant larvae [data from (HERZ *et al.* 2012)], analyzed with GEO2R], suggesting that alterations in *Jarid2* levels might lead to changes in muscle. Mef2 is also among the *Jarid2* bound targets reported by Herz and

colleagues, which generally are enriched significantly for GO terms related to the central nervous system [PANTHER analysis of data from (HERZ *et al.* 2012)]. In addition, publicly available data on Flybase (GRAMATES *et al.* 2017) show that *Mef2* is enriched for H3K27 methylation (H3K27me3) in cells derived from mesoderm of 6-8hr old embryos (BONN *et al.* 2012), suggesting that it might be under control of the polycomb system (as do several other studies (MARINO AND DI FOGGIA 2016)), providing another link between muscle development and the polycomb group proteins *Jarid2* and *Su(z)2*. The polycomb system is reported to also play a role in the developing nervous system (LOMVARDA AND MANIATIS 2016; MOCCIA AND MARTIN 2018), which might be another explanation for the link between *Jarid2*, *Su(z)2*, and activity observed in this study. Thus, the literature suggests several mechanisms by which *Su(z)2* and *Jarid2* might impact animal activity due to their roles in the polycomb system of gene regulation.

In addition, changes in an organism's activity levels have profound impacts, both acute and long-term, ranging from metabolic changes to physical changes to include psychological impacts in humans. Gene expression changes and alterations to the epigenome have been identified as immediate consequences of exercise (HARGREAVES 2015; SOCI *et al.* 2017). For example, there are several studies documenting DNA methylation changes as well as changes in histone acetylation following exercise in multiple systems (VOISIN *et al.* 2015; MCGEE AND WALDER 2017). These epigenetic changes are one possible mechanism that might mediate the long-term consequences of exercise, many of which can persist even in the absence of further exercise. Thus, it is of interest that two proteins linked to the histone methylation mark H3K27me3 and the

polycomb system were identified as contributing to the variation in activity levels between individuals in our study, and future studies in the role of these marks with regard to exercise are needed.

In summary, our study has identified promising candidate genes contributing to the variation in activity levels seen between genetically distinct individuals. Many of the genes identified have not been linked to exercise previously, and they thus present novel avenues for exploration to exercise biologists. Given the clear homology relationships between many of the *Drosophila* genes identified and mammalian genomes, the gene set presented here also provides new research directions for exercise biology studies in rodents. Using the results from model systems such as *Drosophila* as a guide, translational scientists will be able to accelerate biomarker development to eventually allow medical professionals to prescribe individualized exercise treatments for obesity-related diseases and to guide athletes of all kinds.

## ACKNOWLEDGEMENTS

The work described was supported partially by Award Number P30DK056336 from the National Institute Of Diabetes And Digestive And Kidney Diseases through a pilot grant from the UAB Nutrition and Obesity Research Center (NORC) to NCR. The content is solely the responsibility of the authors and does not necessarily represent the official views of the National Institute Of Diabetes And Digestive And Kidney Diseases or the National Institutes of Health.

We would like to thank our undergraduate students Michael Azar, Makayla Nixon, Jamie Hill, and Anthony Foster for their contributions to various aspects of these experiments. Dr. L. Reed (University of Alabama) graciously shared many of the DGRP2 strains with us. Additional stocks obtained from the Bloomington Drosophila Stock Center (NIH P40OD018537) were used in this study.

## FIGURE LEGENDS

**Figure 1. Experimental setup.** Diagram illustrating the experimental setup, how animals were processed, and data were collected.

**Figure 2. Activity levels within the DGRP2 population vary significantly.** This set of bar graphs illustrate the variability in activity levels among the different lines of the DGRP2 population. In each graph, the lines are ordered based on their activity levels from smallest to largest (X-axis), with mean activity levels (average number of beam crossings recorded by the activity monitor in a 5-minute interval) on the Y-axis. The error bars are SEM.

**A.** Bar graph showing line means for basal activity – female.

**B.** Bar graph showing line means for induced activity – female.

**C.** Bar graph showing line means for basal activity – male.

**D.** Bar graph showing line means for induced activity – male.

**Figure 3. Exercise-induced activity measures are strongly correlated between males and females of the same genotype.** This set of scatter plots examines the relationship between activity measures of males and females of the same genotype (A – basal activity; B – exercise-induced activity) and between the two activity measures in either females (C) or males (D). Mean activity levels are plotted as average number of beam crossings recorded by the activity monitor in a 5-minute interval. A linear regression line is shown in all plots, along with the correlation coefficient.



- A.** Scatter plot showing the relationship between basal activity levels in females (X-axis) and in males (Y-axis).
- B.** Scatter plot showing the relationship between induced activity levels in females (X-axis) and in males (Y-axis).
- C.** Scatter plot showing the relationship between basal (X-axis) and exercise-induced (Y-axis) activity levels in females.
- D.** Scatter plot showing the relationship between basal (X-axis) and exercise-induced (Y-axis) activity levels in males.

**Figure 4. GWAS identifies SNPs associated with basal and induced activity levels.**

Chromosomal location of SNPs (X-axis) are plotted against the negative log of the p-value testing for the likelihood of the SNP being associated with the measured phenotype (mixed model; Y-axis). The blue line in each plot marks the  $p=10^{-5}$  significance level, while the red line marks  $p=10^{-7}$ .

- A.** Manhattan plot for basal activity – female.
- B.** Manhattan plot for induced activity – female.
- C.** Manhattan plot for basal activity – male.
- D.** Manhattan plot of induced activity – male.

**Figure 5. The genetic variants identified by the GWAS for basal activity are biased towards exons and upstream genetic elements.** The genetic variants identified as significantly associated with either the basal (left) or exercise-induced (middle) activity were classified based on their sequence context and compared to the

genome-wide set of variants forming the basis of this GWAS (right). The set of variants identified in the basal activity GWAS is significantly different from the genome-wide set ( $p=5.42 \times 10^{-7}$ ; Chi-square test).

**Figure 6. GO analysis highlights the importance of axonal growth cone and neuron recognition for activity levels.** Genetic variants identified in the GWAS for basal analysis were subjected to GO enrichment analysis. Only high-level GO terms meeting the significance threshold are shown (for complete results and individual p-values, see Supplemental Table S5).

**Figure 7. Knockdown of the polycomb group genes *Jarid2* and *Su(z)2* leads to increased activity levels.** *Jarid2* and *Su(z)2* levels are decreased by expressing a UAS-controlled short hairpin construct targeting the gene of interest with a neuronal Gal4 driver (*elav*). In all boxplots, mean activity levels are plotted on the Y-axis, with data from males shown by a red triangle and data from females shown by a blue dot.

**A.** Box plot showing the basal activity levels of animals with lower levels of *Jarid2* in their neuronal tissues (*Jarid2* KD, green) as well as their parents (UAS RNAi line, orange; *elav*-Gal4 line, blue).

**B.** Box plot showing the induced activity levels of animals with lower levels of *Jarid2* in their neuronal tissues (*Jarid2* KD, green) as well as their parents (UAS RNAi line, orange; *elav*-Gal4 line, blue).

**C.** Box plot showing the basal activity levels of animals with lower levels of *Su(z)2* in their neuronal tissues (*Su(z)2* KD, brown) as well as their parents (UAS RNAi line, purple; elav-Gal4 line, blue).

**D.** Box plot showing the induced activity levels of animals with lower levels of *Su(z)2* in their neuronal tissues (*Su(z)2* KD, brown) as well as their parents (UAS RNAi line, purple; elav-Gal4 line, blue).

**Figure S1. Histograms illustrating the variability in activity levels among the lines of the DGRP2 population.** All lines binned based on their mean activity levels (average number of beam crossings recorded by the activity monitor in a 5-minute interval; bin size: 10). The bins are indicated on the X-axis (average number of beam crossings recorded by the activity monitor in a 5 minute interval), and the number of lines in each bin is shown on the Y-axis.

**A.** Histogram for basal activity in females.

**B.** Histogram for induced activity in females.

**C.** Histogram for basal activity in males.

**D.** Histogram for induced activity in males.

**Figure S2. Correlation between activity levels and lifespan.** To investigate the relationship between animal activity and lifespan, animal activity levels (X-axis, average number of beam crossings recorded by the activity monitor in a 5-minute interval) are plotted against life span (Y-axis, days) for each DGRP2 strain.

**A.** Basal activity.

**B. Induced activity.**

**Figure S3. Genetic variants associated with basal and induced activity levels in a GWAS using combined data from both sexes.** Chromosomal location of genetic variants (X-axis) are plotted against the negative log of the p-value testing for the likelihood of the variant being associated with the measured phenotype (Y-axis). The blue line in each plot marks the  $p=10^{-5}$  significance level, while the red line marks  $p=10^{-7}$ .

**A.** Manhattan plot for basal activity.

**B.** Manhattan plot for induced activity.

**Figure S4. Small areas of linkage disequilibrium (LD) exist for the genetic variants associated with basal and exercise-induced activity.**

Heat maps illustrating the extent of LD among the genetic variants identified as significantly contributing to the basal (**A**) and exercise-induced (**B**) activity levels. The level of LD is indicated by the color of each square with red indicating the highest level of LD and blue indicating the absence of LD. The genetic variants are plotted based on their chromosomal location (X-and Y-axis), with the diagonal showing areas of with the strongest LD due to close physical proximity.

## TABLES

### **Table 1. Treatment, sex, and genotype show strong effects on activity levels.**

General linear model analysis of variance reveals the impact of treatment (+/- rotational stimulation), sex, and genotype on the activity phenotype measured.

### **Table 2. Summary of GWAS results.** The table lists the number of genetic variants detected as significant by the different analysis types used in this study.

### **Supplemental Table S1. Strains used for candidate gene analysis.** This table contains the genotypes and Bloomington stock numbers of the strains analyzed.

### **Supplemental Table S2. List of DGRP lines included in this study.**

Table is separated by treatment and sex for each line. Y = Yes, N = No.

### **Supplemental Table S3. Phenotypic measures used in the GWAS analysis.**

Summary data as submitted to the DGRP2 GWAS webtool as well as raw data are provided.

### **Supplemental Table S4. Candidate genetic variants identified as significant by the GWAS.** This table includes results from the basal activity GWAS and the exercise-induced activity GWAS.

770 **Supplemental Table S5. Detailed GO term enrichment analysis results for genetic**  
 771 **variants associated with basal activity.** This table includes the complete GO term  
 772 enrichment analysis results for the “Cellular component” and “Biological Process”  
 773 categories for genetic variants associated with basal activity.  
 774  
 775

# LITERATURE CITED

- Andersen, G., M. C. Orngreen, N. Preisler, T. D. Jeppesen, T. O. Krag *et al.*, 2015 Protein-carbohydrate supplements improve muscle protein balance in muscular dystrophy patients after endurance exercise: a placebo-controlled crossover study. *Am J Physiol Regul Integr Comp Physiol* 308: R123-130.
- Baretic, M., 2013 Obesity drug therapy. *Minerva Endocrinol* 38: 245-254.
- Bellen, H. J., H. Vaessin, E. Bier, A. Kolodkin, D. D'Evelyn *et al.*, 1992 The *Drosophila couch potato* gene: an essential gene required for normal adult behavior. *Genetics* 131: 365-375.
- Berger, N. A., 2014 Obesity and cancer pathogenesis. *Ann N Y Acad Sci* 1311: 57-76.
- Biener, A., J. Cawley and C. Meyerhoefer, 2018 The Impact of Obesity on Medical Care Costs and Labor Market Outcomes in the US. *Clinical Chemistry* 64: 108-117.
- Blazek, A. D., J. Nam, R. Gupta, M. Pradhan, P. Perera *et al.*, 2016 Exercise-Driven Metabolic Pathways in Healthy Cartilage. *Osteoarthritis Cartilage* 24: 1210-1222.
- Bonn, S., R. P. Zinzen, C. Girardot, E. H. Gustafson, A. Perez-Gonzalez *et al.*, 2012 Tissue-specific analysis of chromatin state identifies temporal signatures of enhancer activity during embryonic development. *Nat Genet* 44: 148-156.
- Booth, F. W., C. K. Roberts and M. J. Laye, 2012 Lack of exercise is a major cause of chronic diseases. *Compr Physiol* 2: 1143-1211.
- Bouchard, C., P. An, T. Rice, J. S. Skinner, J. H. Wilmore *et al.*, 1999 Familial aggregation of VO(2max) response to exercise training: results from the HERITAGE Family Study. *J Appl Physiol* (1985) 87: 1003-1008.

798 Bouchard, C., T. Rankinen and J. A. Timmons, 2011 Genomics and Genetics in the  
799 Biology of Adaptation to Exercise. *Compr Physiol* 1: 1603-1648.

800 Breit, M., M. Netzer, K. M. Weinberger and C. Baumgartner, 2015 Modeling and  
801 Classification of Kinetic Patterns of Dynamic Metabolic Biomarkers in Physical  
802 Activity. *PLOS Computational Biology* 11: e1004454.

803 Brocklebank, L. A., C. L. Falconer, A. S. Page, R. Perry and A. R. Cooper, 2015  
804 Accelerometer-measured sedentary time and cardiometabolic biomarkers: A  
805 systematic review. *Prev Med* 76: 92-102.

806 Carmienke, S., M. H. Freitag, T. Pischon, P. Schlattmann, T. Fankhaenel *et al.*, 2013  
807 General and abdominal obesity parameters and their combination in relation to  
808 mortality: a systematic review and meta-regression analysis. *Eur J Clin Nutr* 67:  
809 573-585.

810 Coen, P. M., E. V. Menshikova, G. Distefano, D. Zheng, C. J. Tanner *et al.*, 2015  
811 Exercise and Weight Loss Improve Muscle Mitochondrial Respiration, Lipid  
812 Partitioning, and Insulin Sensitivity After Gastric Bypass Surgery. *Diabetes* 64:  
813 3737-3750.

814 Coyle, I. P., Y. H. Koh, W. C. Lee, J. Slind, T. Fergestad *et al.*, 2004 Nervous wreck, an  
815 SH3 adaptor protein that interacts with Wsp, regulates synaptic growth in  
816 *Drosophila*. *Neuron* 41: 521-534.

817 de Geus, E. J., M. Bartels, J. Kaprio, J. T. Lightfoot and M. Thomis, 2014 Genetics of  
818 regular exercise and sedentary behaviors. *Twin Res Hum Genet* 17: 262-271.

819 DHHS, 2008 2008 physical activity guidelines for Americans.



Durham, M. F., M. M. Magwire, E. A. Stone and J. Leips, 2014 Genome-wide analysis in *Drosophila* reveals age-specific effects of SNPs on fitness traits. *Nat Commun* 5: 4338.

Ebbert, J. O., M. Y. Elrashidi and M. D. Jensen, 2014 Managing overweight and obesity in adults to reduce cardiovascular disease risk. *Curr Atheroscler Rep* 16: 445.

Edison, A. S., R. D. Hall, C. Junot, P. D. Karp, I. J. Kurland *et al.*, 2016 The Time Is Right to Focus on Model Organism Metabolomes. *Metabolites* 6.

Flegal, K. M., B. K. Kit, H. Orpana and B. I. Graubard, 2013 Association of all-cause mortality with overweight and obesity using standard body mass index categories: a systematic review and meta-analysis. *Jama* 309: 71-82.

Fochler, S., T. V. Morozova, M. R. Davis, A. W. Gearhart, W. Huang *et al.*, 2017 Genetics of alcohol consumption in *Drosophila melanogaster*. *Genes Brain Behav* 16: 675-685.

Fonseca-Junior, S. J., C. G. Sa, P. A. Rodrigues, A. J. Oliveira and J. Fernandes-Filho, 2013 Physical exercise and morbid obesity: a systematic review. *Arq Bras Cir Dig* 26 Suppl 1: 67-73.

Garg, S. K., H. Maurer, K. Reed and R. Selagamsetty, 2014 Diabetes and cancer: two diseases with obesity as a common risk factor. *Diabetes Obes Metab* 16: 97-110.

Garlapow, M. E., W. Huang, M. T. Yarboro, K. R. Peterson and T. F. Mackay, 2015 Quantitative Genetics of Food Intake in *Drosophila melanogaster*. *PLoS One* 10: e0138129.

Glasscock, E., and M. A. Tanouye, 2005 *Drosophila couch potato* mutants exhibit complex neurological abnormalities including epilepsy phenotypes. *Genetics* 169: 2137-2149.

Gramates, L. S., S. J. Marygold, G. d. Santos, J.-M. Urbano, G. Antonazzo *et al.*, 2017 FlyBase at 25: looking to the future. *Nucleic Acids Research* 45: D663-D671.

Hargreaves, M., 2015 Exercise and Gene Expression. *Prog Mol Biol Transl Sci* 135: 457-469.

Hartemink, N., H. C. Boshuizen, N. J. Nagelkerke, M. A. Jacobs and H. C. van Houwelingen, 2006 Combining risk estimates from observational studies with different exposure cutpoints: a meta-analysis on body mass index and diabetes type 2. *Am J Epidemiol* 163: 1042-1052.

Herz, H. M., M. Mohan, A. S. Garrett, C. Miller, D. Casto *et al.*, 2012 Polycomb repressive complex 2-dependent and -independent functions of *jarid2* in transcriptional regulation in *Drosophila*. *Molecular and Cellular Biology* 32: 1683-1693.

Hewitt, V. L., and A. J. Whitworth, 2017 Mechanisms of Parkinson's Disease: Lessons from *Drosophila*. *Curr Top Dev Biol* 121: 173-200.

Huang da, W., B. T. Sherman and R. A. Lempicki, 2009a Bioinformatics enrichment tools: paths toward the comprehensive functional analysis of large gene lists. *Nucleic Acids Res* 37: 1-13.

Huang da, W., B. T. Sherman and R. A. Lempicki, 2009b Systematic and integrative analysis of large gene lists using DAVID bioinformatics resources. *Nat Protoc* 4: 44-57.

864 Huang, W., A. Massouras, Y. Inoue, J. Peiffer, M. Ramia *et al.*, 2014 Natural variation in  
865 genome architecture among 205 *Drosophila melanogaster* Genetic Reference  
866 Panel lines. *Genome Res* 24: 1193-1208.

867 Husken, M., K. Hufnagel, K. Mende, E. Appel, H. Meyer *et al.*, 2015 Adhesive pad  
868 differentiation in *Drosophila melanogaster* depends on the Polycomb group gene  
869 *Su(z)2*. *J Exp Biol* 218: 1613.

870 IBM, 2017 IBM SPSS Statistics 25.

871 Inc, S. I., 2013 SAS/ACCESS® 9.4 Interface to ADABAS, pp. SAS Institute Inc., Cary,  
872 NC.

873 Jordan, K. W., K. L. Craver, M. M. Magwire, C. E. Cubilla, T. F. Mackay *et al.*, 2012  
874 Genome-wide association for sensitivity to chronic oxidative stress in *Drosophila*  
875 *melanogaster*. *PLoS One* 7: e38722.

876 Kalisch, W. E., and B. Rasmuson, 1974 Changes of zeste phenotype induced by  
877 autosomal mutations in *Drosophila melanogaster*. *Hereditas* 78: 97-104.

878 Karoly, H. C., C. J. Stevens, R. E. Magnan, N. Harlaar, K. E. Hutchison *et al.*, 2012  
879 Genetic Influences on Physiological and Subjective Responses to an Aerobic  
880 Exercise Session among Sedentary Adults. *J Cancer Epidemiol* 2012: 540563.

881 Keith, S. W., D. T. Redden, P. T. Katzmarzyk, M. M. Boggiano, E. C. Hanlon *et al.*, 2006  
882 Putative contributors to the secular increase in obesity: exploring the roads less  
883 traveled. *Int J Obes (Lond)* 30: 1585-1594.

884 Kim, H. J., B. So, M. Choi, D. Kang and W. Song, 2015 Resistance exercise training  
885 increases the expression of irisin concomitant with improvement of muscle  
886 function in aging mice and humans. *Exp Gerontol* 70: 11-17.

887 Kushner, R. F., 2014 Weight loss strategies for treatment of obesity. Prog Cardiovasc  
888 Dis 56: 465-472.

889 Larew, K., G. R. Hunter, D. E. Larson-Meyer, B. R. Newcomer, J. P. McCarthy *et al.*,  
890 2003 Muscle metabolic function, exercise performance, and weight gain. Med Sci  
891 Sports Exerc 35: 230-236.

892 Laskowski, E. R., 2012 The role of exercise in the treatment of obesity. Pm r 4: 840-  
893 844; quiz 844.

894 Lin, D. M., and C. S. Goodman, 1994 Ectopic and increased expression of Fasciclin II  
895 alters motoneuron growth cone guidance. Neuron 13: 507-523.

896 Lo, S. M., N. K. Ahuja and N. J. Francis, 2009 Polycomb group protein Suppressor 2 of  
897 zeste is a functional homolog of Posterior Sex Combs. Molecular and Cellular  
898 Biology 29: 515-525.

899 Lomvardas, S., and T. Maniatis, 2016 Histone and DNA Modifications as Regulators of  
900 Neuronal Development and Function. Cold Spring Harb Perspect Biol 8.

901 Mackay, T. F., S. Richards, E. A. Stone, A. Barbadilla, J. F. Ayroles *et al.*, 2012 The  
902 *Drosophila melanogaster* Genetic Reference Panel. Nature 482: 173-178.

903 Marino, S., and V. Di Foggia, 2016 Invited Review: Polycomb group genes in the  
904 regeneration of the healthy and pathological skeletal muscle. Neuropathol Appl  
905 Neurobiol 42: 407-422.

906 Martin, K. A., M. V. Mani and A. Mani, 2015 New targets to treat obesity and the  
907 metabolic syndrome. Eur J Pharmacol 763: 64-74.

908 Masters, R. K., D. A. Powers and B. G. Link, 2013 Obesity and US mortality risk over  
909 the adult life course. Am J Epidemiol 177: 431-442.

910 McAllister, E. J., N. V. Dhurandhar, S. W. Keith, L. J. Aronne, J. Barger *et al.*, 2009 Ten  
 911 Putative Contributors to the Obesity Epidemic. *Crit Rev Food Sci Nutr* 49: 868-  
 912 913.

913 McGee, S. L., and K. R. Walder, 2017 Exercise and the Skeletal Muscle Epigenome.  
 914 Cold Spring Harb Perspect Med 7.

915 McQueen, M. A., 2009 Exercise Aspects of Obesity Treatment. *Ochsner J* 9: 140-143.

916 Mendez, S., L. Watanabe, R. Hill, M. Owens, J. Moraczewski *et al.*, 2016 The  
 917 TreadWheel: A Novel Apparatus to Measure Genetic Variation in Response to  
 918 Gently Induced Exercise for *Drosophila*. *PLOS ONE* 11: e0164706.

919 Mi, H., X. Huang, A. Muruganujan, H. Tang, C. Mills *et al.*, 2017 PANTHER version 11:  
 920 expanded annotation data from Gene Ontology and Reactome pathways, and  
 921 data analysis tool enhancements. *Nucleic Acids Research* 45: D183-D189.

922 Mi, H., A. Muruganujan, J. T. Casagrande and P. D. Thomas, 2013 Large-scale gene  
 923 function analysis with the PANTHER classification system. *Nature Protocols* 8:  
 924 1551.

925 Mitrou, P., S. A. Raptis and G. Dimitriadis, 2013 Insulin action in morbid obesity: a focus  
 926 on muscle and adipose tissue. *Hormones (Athens)* 12: 201-213.

927 Moccia, A., and D. M. Martin, 2018 Nervous system development and disease: A focus  
 928 on trithorax related proteins and chromatin remodelers. *Mol Cell Neurosci* 87: 46-  
 929 54.

930 Molica, F., S. Morel, B. R. Kwak, F. Rohner-Jeanrenaud and S. Steffens, 2015  
 931 Adipokines at the crossroad between obesity and cardiovascular disease.  
 932 *Thromb Haemost* 113: 553-566.

933 Nakamura, K., J. J. Fuster and K. Walsh, 2014 Adipokines: A link between obesity and  
 934 cardiovascular disease. *J Cardiol* 63: 250-259.

935 Nguyen, S. C., S. Yu, E. Oberlick and C. T. Wu, 2017 An Unexpected Regulatory  
 936 Cascade Governs a Core Function of the *Drosophila* PRC1 Chromatin Protein  
 937 Su(z)2. *Genetics* 205: 551-558.

938 Nomura, D. K., J. Z. Long, S. Niessen, H. S. Hoover, S. W. Ng *et al.*, 2010  
 939 Monoacylglycerol lipase regulates a fatty acid network that promotes cancer  
 940 pathogenesis. *Cell* 140: 49-61.

941 Ober, U., J. F. Ayroles, E. A. Stone, S. Richards, D. Zhu *et al.*, 2012 Using whole-  
 942 genome sequence data to predict quantitative trait phenotypes in *Drosophila*  
 943 *melanogaster*. *PLoS Genet* 8: e1002685.

944 Pandey, U. B., and C. D. Nichols, 2011 Human disease models in *Drosophila*  
 945 *melanogaster* and the role of the fly in therapeutic drug discovery. *Pharmacol*  
 946 *Rev* 63: 411-436.

947 Park, J., T. S. Morley, M. Kim, D. J. Clegg and P. E. Scherer, 2014 Obesity and cancer-  
 948 -mechanisms underlying tumour progression and recurrence. *Nat Rev Endocrinol*  
 949 10: 455-465.

950 Perkins, L. A., L. Holderbaum, R. Tao, Y. Hu, R. Sopko *et al.*, 2015 The Transgenic  
 951 RNAi Project at Harvard Medical School: Resources and Validation. *Genetics*  
 952 201: 843-852.

953 Piazza, N., B. Gosangi, S. Devilla, R. Arking and R. Wessells, 2009 Exercise-training in  
 954 young *Drosophila melanogaster* reduces age-related decline in mobility and  
 955 cardiac performance. *PLoS One* 4: e5886.

956 Polsky, S., and S. L. Ellis, 2015 Obesity, insulin resistance, and type 1 diabetes mellitus.  
957 Curr Opin Endocrinol Diabetes Obes 22: 277-282.

958 R Development Core Team, 2018. R: A language and environment for statistical  
959 computing, pp. R Foundation for Statistical Computing, Vienna Austria.

960 Ranganayakulu, G., D. A. Elliott, R. P. Harvey and E. N. Olson, 1998 Divergent roles for  
961 NK-2 class homeobox genes in cardiogenesis in flies and mice. Development  
962 125: 3037-3048.

963 Rawls, A. S., S. A. Schultz, R. D. Mitra and T. Wolff, 2007 Bedraggled, a putative  
964 transporter, influences the tissue polarity complex during the R3/R4 fate decision  
965 in the Drosophila eye. Genetics 177: 313-328.

966 Reimers, C. D., G. Knapp and A. K. Reimers, 2012 Does physical activity increase life  
967 expectancy? A review of the literature. J Aging Res 2012: 243958.

968 Riobo Servan, P., 2013 Obesity and diabetes. Nutr Hosp 28 Suppl 5: 138-143.

969 Rodal, A. A., R. N. Motola-Barnes and J. T. Littleton, 2008 Nervous wreck and Cdc42  
970 cooperate to regulate endocytic actin assembly during synaptic growth. J  
971 Neurosci 28: 8316-8325.

972 Rohde, P. D., S. Østergaard, T. N. Kristensen, P. Sørensen, V. Loeschcke *et al.*, 2018  
973 Functional Validation of Candidate Genes Detected by Genomic Feature Models.  
974 G3: Genes|Genomes|Genetics 8: 1659-1668.

975 Sasai, N., Y. Kato, G. Kimura, T. Takeuchi and M. Yamaguchi, 2007 The Drosophila  
976 *jumonji* gene encodes a JmjC-containing nuclear protein that is required for  
977 metamorphosis. FEBS Journal 274: 6139-6151.

978 Schmidt, P. S., C.-T. Zhu, J. Das, M. Batavia, L. Yang *et al.*, 2008 An amino acid  
979 polymorphism in the couch potato gene forms the basis for climatic adaptation in  
980 *Drosophila melanogaster*. *Proceedings of the National Academy of Sciences of*  
981 *the United States of America* 105: 16207-16211.

982 Schneider, D., 2000 Using *Drosophila* as a model insect. *Nat Rev Genet* 1: 218-226.

983 Schnorrer, F., C. Schönbauer, C. C. H. Langer, G. Dietzl, M. Novatchkova *et al.*, 2010  
984 Systematic genetic analysis of muscle morphogenesis and function in *Drosophila*.  
985 *Nature* 464: 287.

986 Shalaby, N. A., R. Sayed, Q. Zhang, S. Scoggin, S. Eliazar *et al.*, 2017 Systematic  
987 discovery of genetic modulation by Jumonji histone demethylases in *Drosophila*.  
988 *Sci Rep* 7: 5240.

989 Sisnowski, J., E. Handsley and J. M. Street, 2015 Regulatory approaches to obesity  
990 prevention: A systematic overview of current laws addressing diet-related risk  
991 factors in the European Union and the United States. *Health Policy* 119: 720-731.

992 Soci, U. P. R., S. F. S. Melo, J. L. P. Gomes, A. C. Silveira, C. Nobrega *et al.*, 2017  
993 Exercise Training and Epigenetic Regulation: Multilevel Modification and  
994 Regulation of Gene Expression. *Adv Exp Med Biol* 1000: 281-322.

995 Stephens, N. A., and L. M. Sparks, 2015 Resistance to the beneficial effects of exercise  
996 in type 2 diabetes: are some individuals programmed to fail? *J Clin Endocrinol*  
997 *Metab* 100: 43-52.

998 Stubbe, J. H., D. I. Boomsma, J. M. Vink, B. K. Cornes, N. G. Martin *et al.*, 2006  
999 Genetic Influences on Exercise Participation in 37,051 Twin Pairs from Seven  
1000 Countries. *PLOS ONE* 1: e22.



1001 Sujkowski, A., B. Bazzell, K. Carpenter, R. Arking and R. J. Wessells, 2015 Endurance  
 1002 exercise and selective breeding for longevity extend *Drosophila* healthspan by  
 1003 overlapping mechanisms. *Aging* (Albany NY) 7: 535-552.

1004 Taylor, M. V., and S. M. Hughes, 2017 Mef2 and the skeletal muscle differentiation  
 1005 program. *Semin Cell Dev Biol* 72: 33-44.

1006 Tinkerhess, M. J., L. Healy, M. Morgan, A. Sujkowski, E. Matthys *et al.*, 2012 The  
 1007 *Drosophila* PGC-1 $\alpha$  Homolog spargel Modulates the Physiological Effects of  
 1008 Endurance Exercise. *PLOS ONE* 7: e31633.

1009 Tonevitsky, A. G., D. V. Maltseva, A. Abbasi, T. R. Samatov, D. A. Sakharov *et al.*, 2013  
 1010 Dynamically regulated miRNA-mRNA networks revealed by exercise. *BMC*  
 1011 *Physiology* 13: 9.

1012 Ugur, B., K. Chen and H. J. Bellen, 2016 *Drosophila* tools and assays for the study of  
 1013 human diseases. *Dis Model Mech* 9: 235-244.

1014 van der Voet, M., B. Harich, B. Franke and A. Schenck, 2015 ADHD-associated  
 1015 dopamine transporter, latrophilin and neurofibromin share a dopamine-related  
 1016 locomotor signature in *Drosophila*. *Molecular Psychiatry* 21: 565.

1017 Voisin, S., N. Eynon, X. Yan and D. J. Bishop, 2015 Exercise training and DNA  
 1018 methylation in humans. *Acta Physiol (Oxf)* 213: 39-59.

1019 Watanabe, L. P., and N. C. Riddle, 2017 Characterization of the Rotating Exercise  
 1020 Quantification System (REQS), a novel *Drosophila* exercise quantification  
 1021 apparatus. *PLOS ONE* 12: e0185090.

1022 Watanabe, L. P., and N. C. Riddle, 2018 Measuring Exercise Levels in *Drosophila*  
1023 *melanogaster* Using the Rotating Exercise Quantification System (REQS). JoVE:  
1024 e57751.

1025 Wu, C., and M. Howe, 1995 A genetic analysis of the suppressor 2 of zeste complex of  
1026 *Drosophila melanogaster*. Genetics 140: 139-181.

1027 Wyatt, H. R., 2013 Update on Treatment Strategies for Obesity. J Clin Endocrinol Metab  
1028 98: 1299-1306.

1029

1030

**Table 1. Treatment, sex, and genotype show strong effects on activity levels.**

| Source                                                                                                                                                          | Type III        |     |         |
|-----------------------------------------------------------------------------------------------------------------------------------------------------------------|-----------------|-----|---------|
|                                                                                                                                                                 | Wald Chi-Square | df  | p-value |
| (Intercept)                                                                                                                                                     | 115810.796      | 1   | 0.000   |
| Genotype                                                                                                                                                        | 8550.945        | 160 | 0.000   |
| Sex                                                                                                                                                             | 377.098         | 1   | 0.000   |
| Treatment                                                                                                                                                       | 3273.344        | 1   | 0.000   |
| Genotype * Sex                                                                                                                                                  | 2342.484        | 155 | 0.000   |
| Sex * Treatment                                                                                                                                                 | 109.291         | 1   | 0.000   |
| Genotype * Treatment                                                                                                                                            | 2367.982        | 145 | 0.000   |
| Genotype * Sex * Treatment                                                                                                                                      | 857.944         | 140 | 0.000   |
| Dependent Variable: Activity<br>Model: (Intercept), Genotype, Sex, Treatment, Genotype * Sex * Treatment, Genotype * Sex, Sex * Treatment, Genotype * Treatment |                 |     |         |

df: degrees of freedom

**Table 2. Summary of GWAS results.**

|                                                         | Mixed model analysis |        |      | Regression analysis |        |      | Total |
|---------------------------------------------------------|----------------------|--------|------|---------------------|--------|------|-------|
|                                                         | Average              | Female | Male | Average             | Female | Male |       |
| <b># of variants identified<br/>(basal activity)</b>    | 46                   | 53     | 93   | 69                  | 45     | 142  | 314   |
| <b># of variants identified<br/>(exercise activity)</b> | 47                   | 41     | 31   | 46                  | 15     | 29   | 81    |

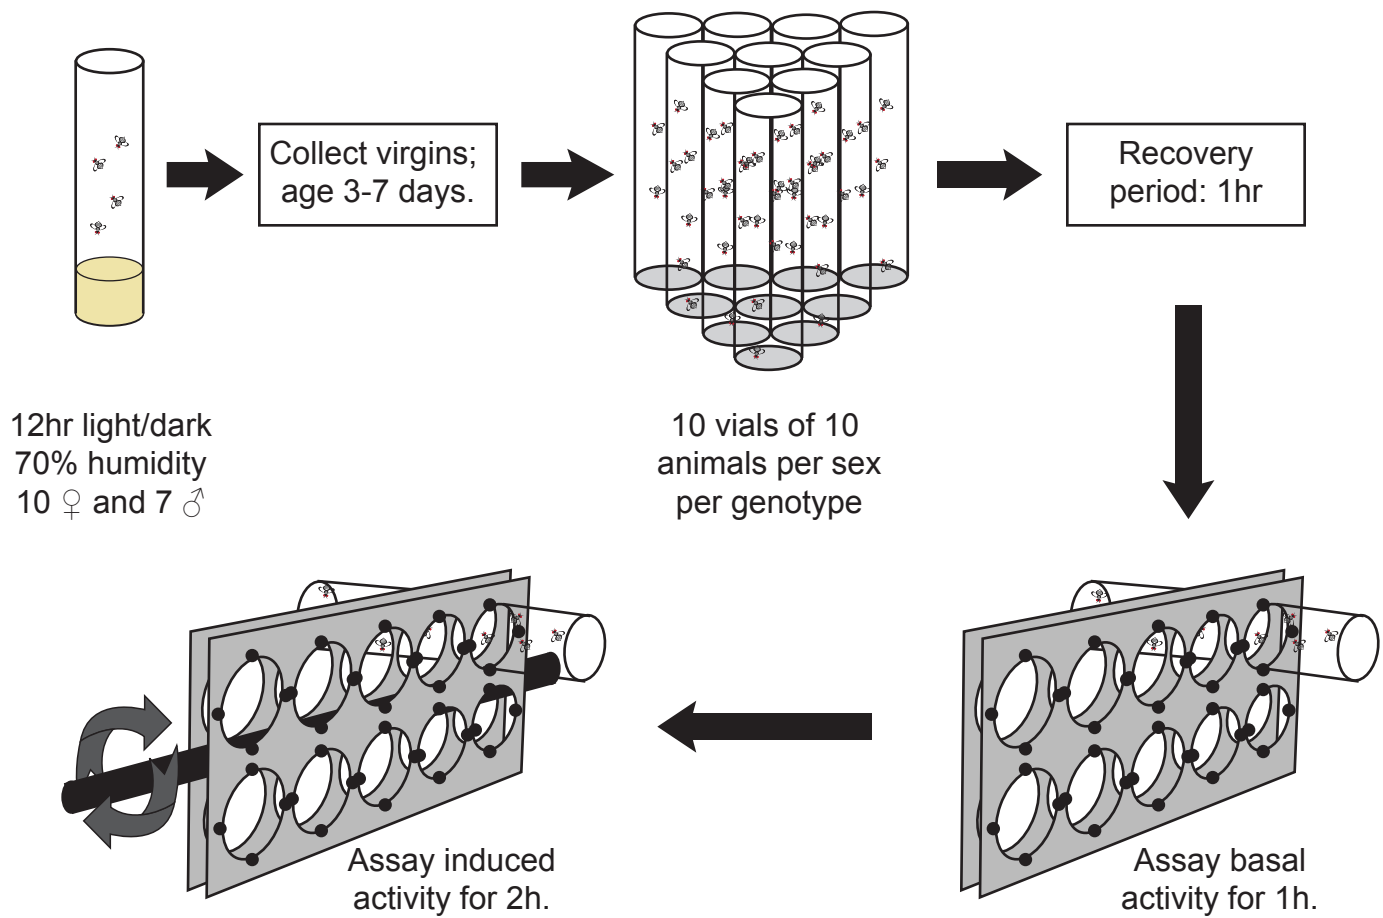

**A**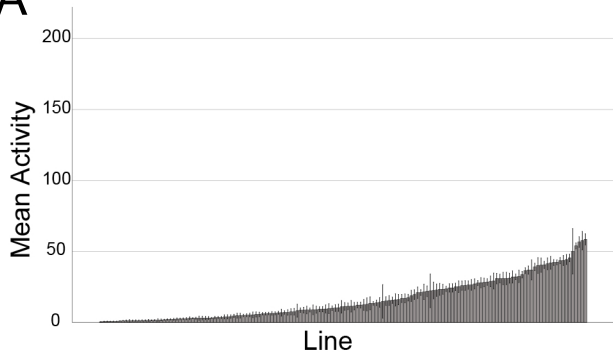**B**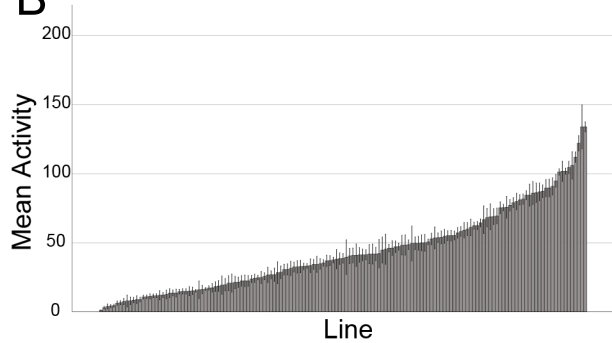**C**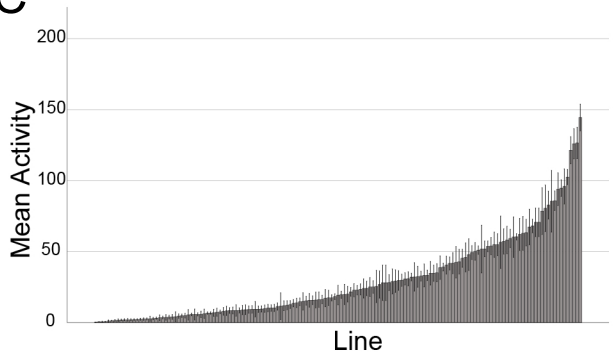**D**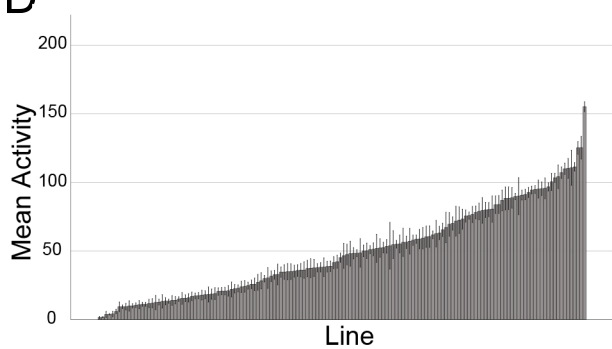

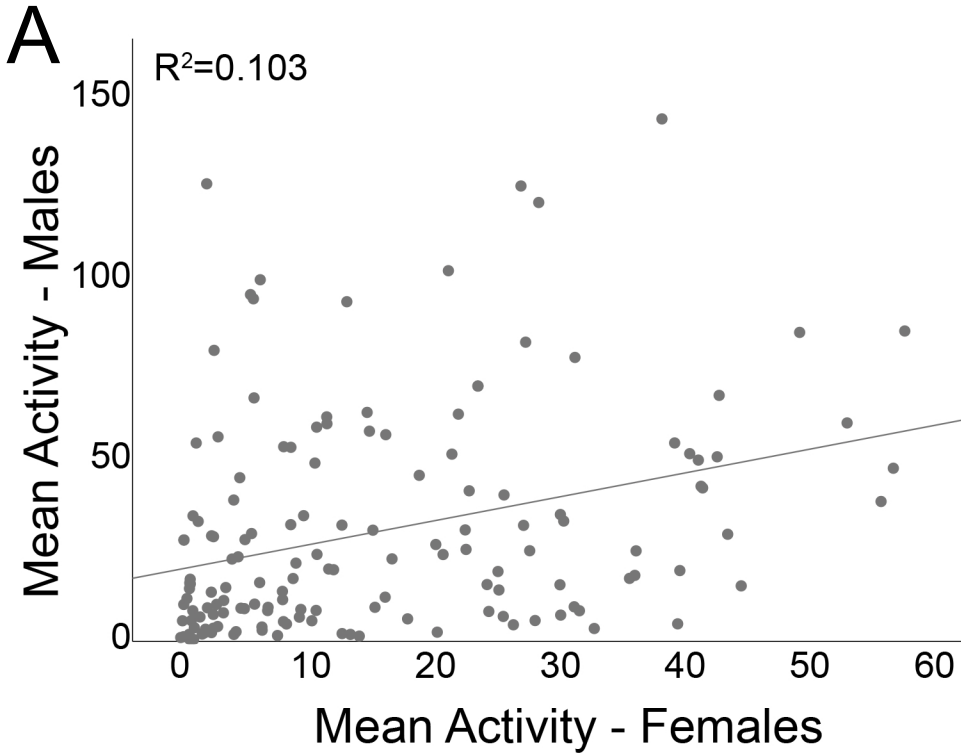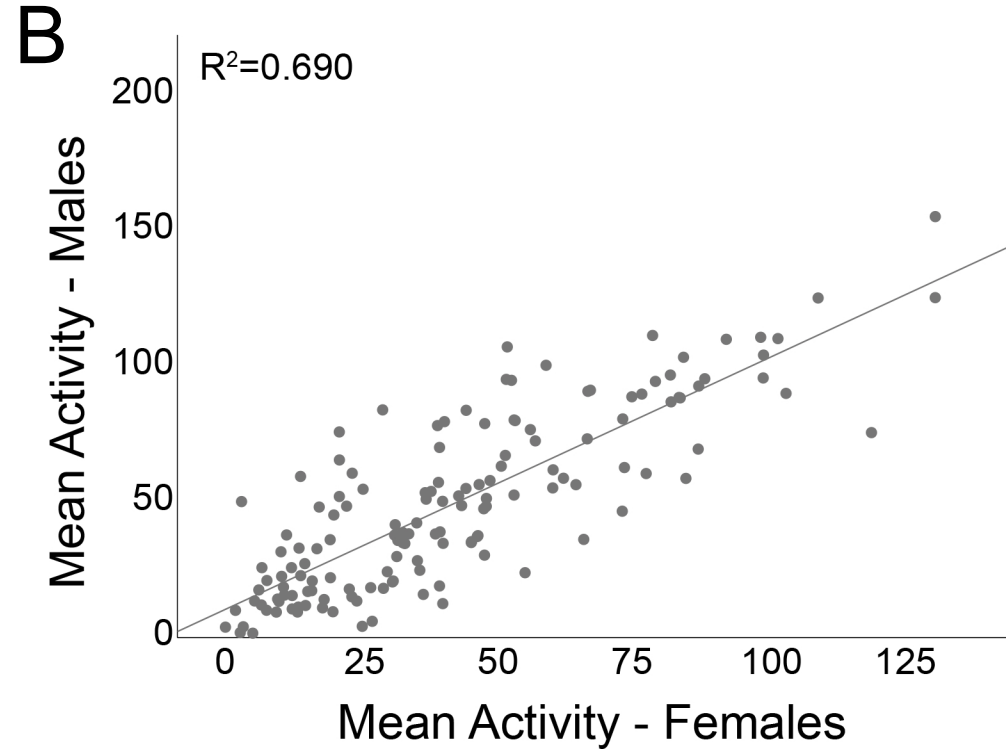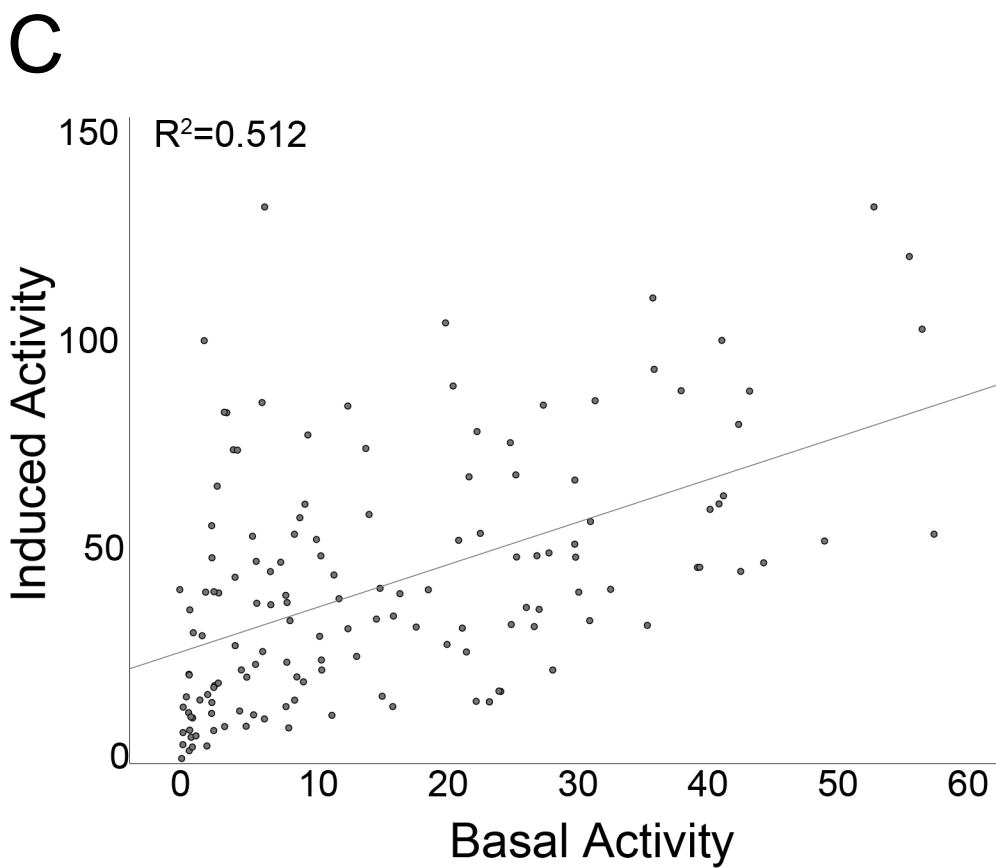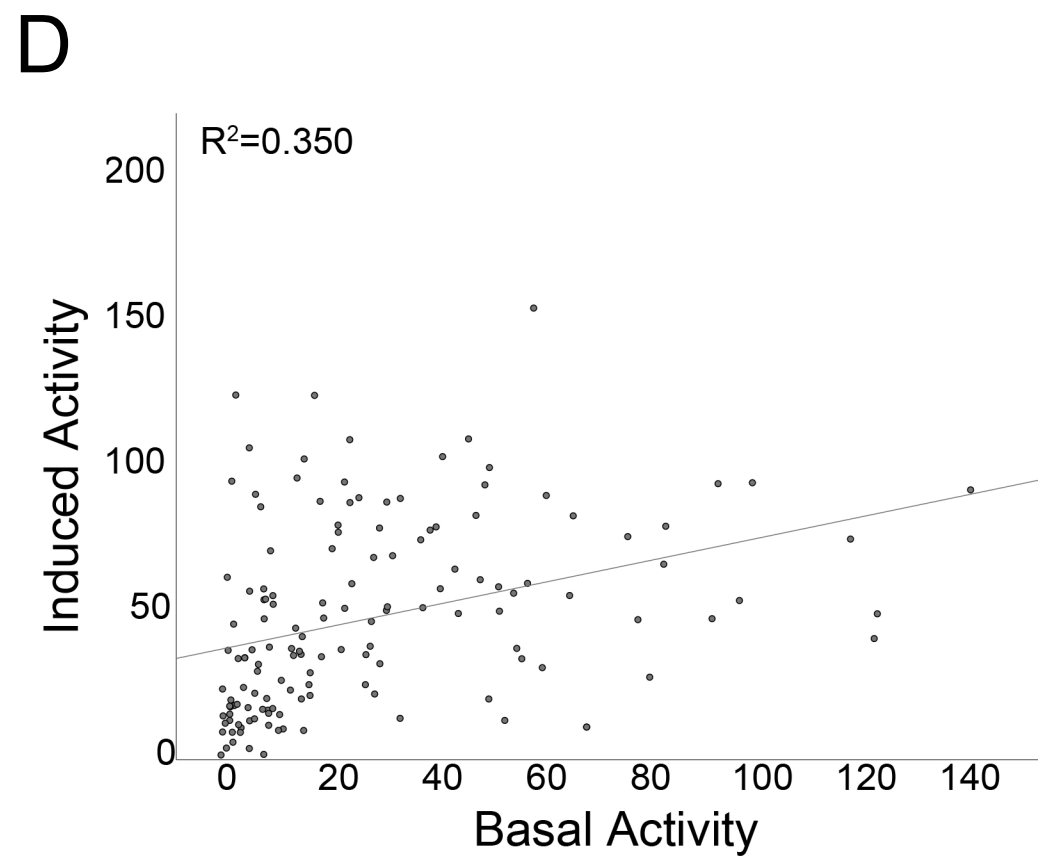

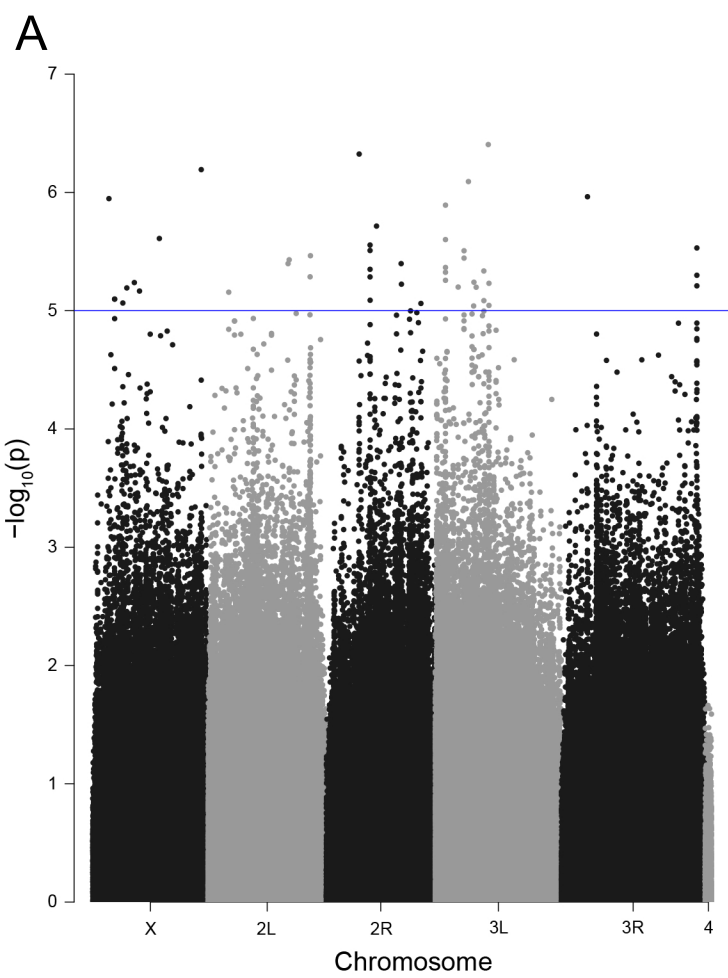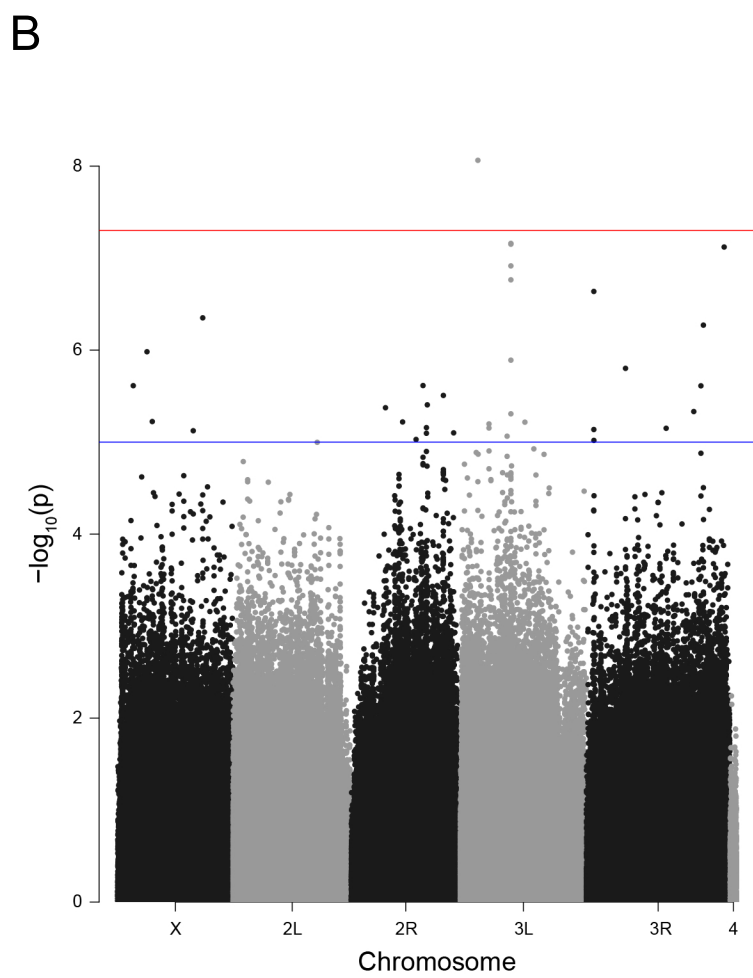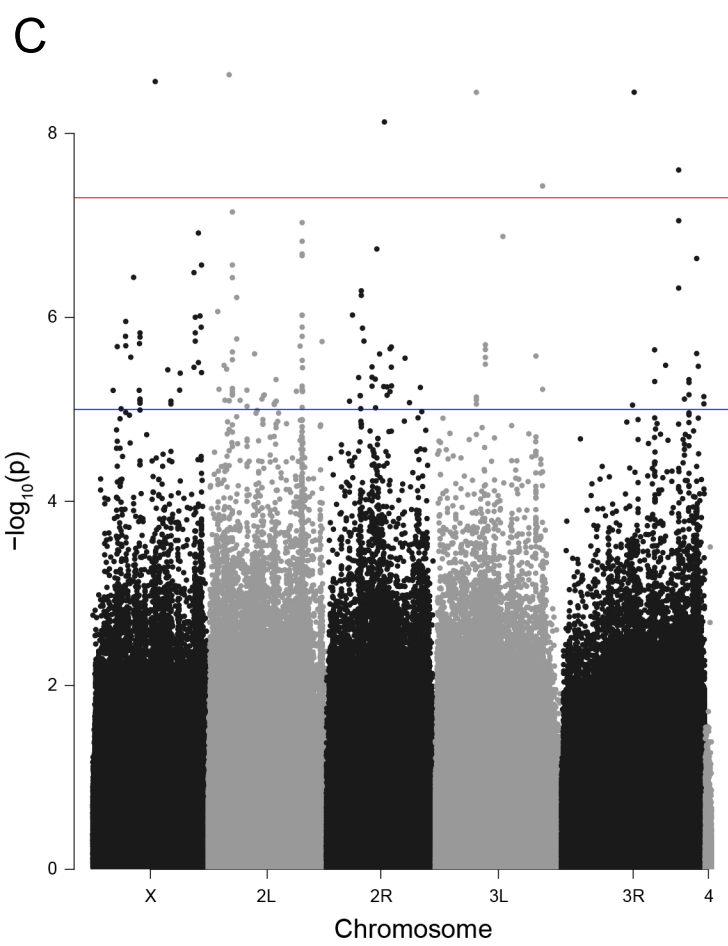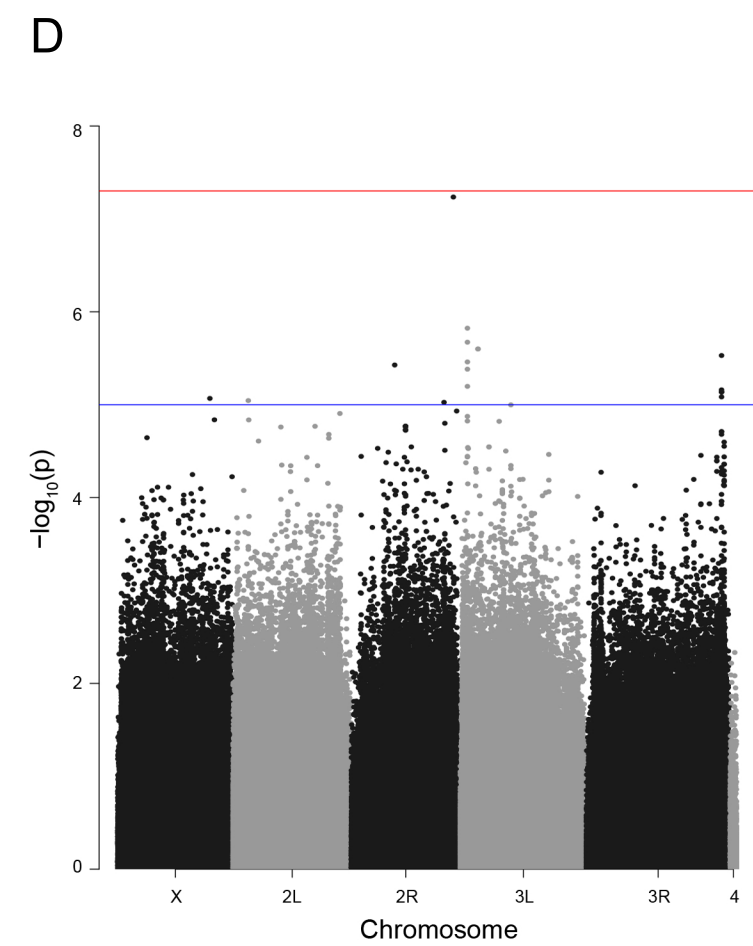



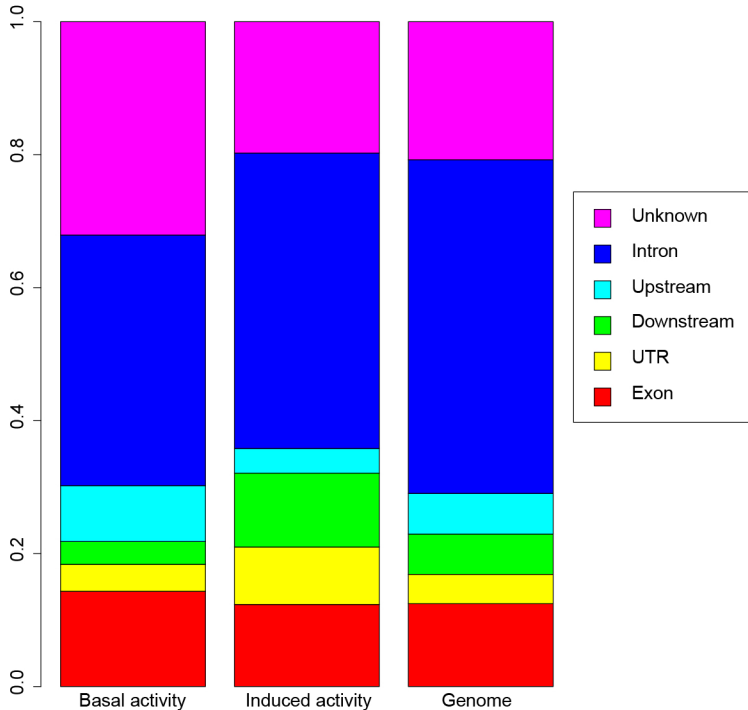

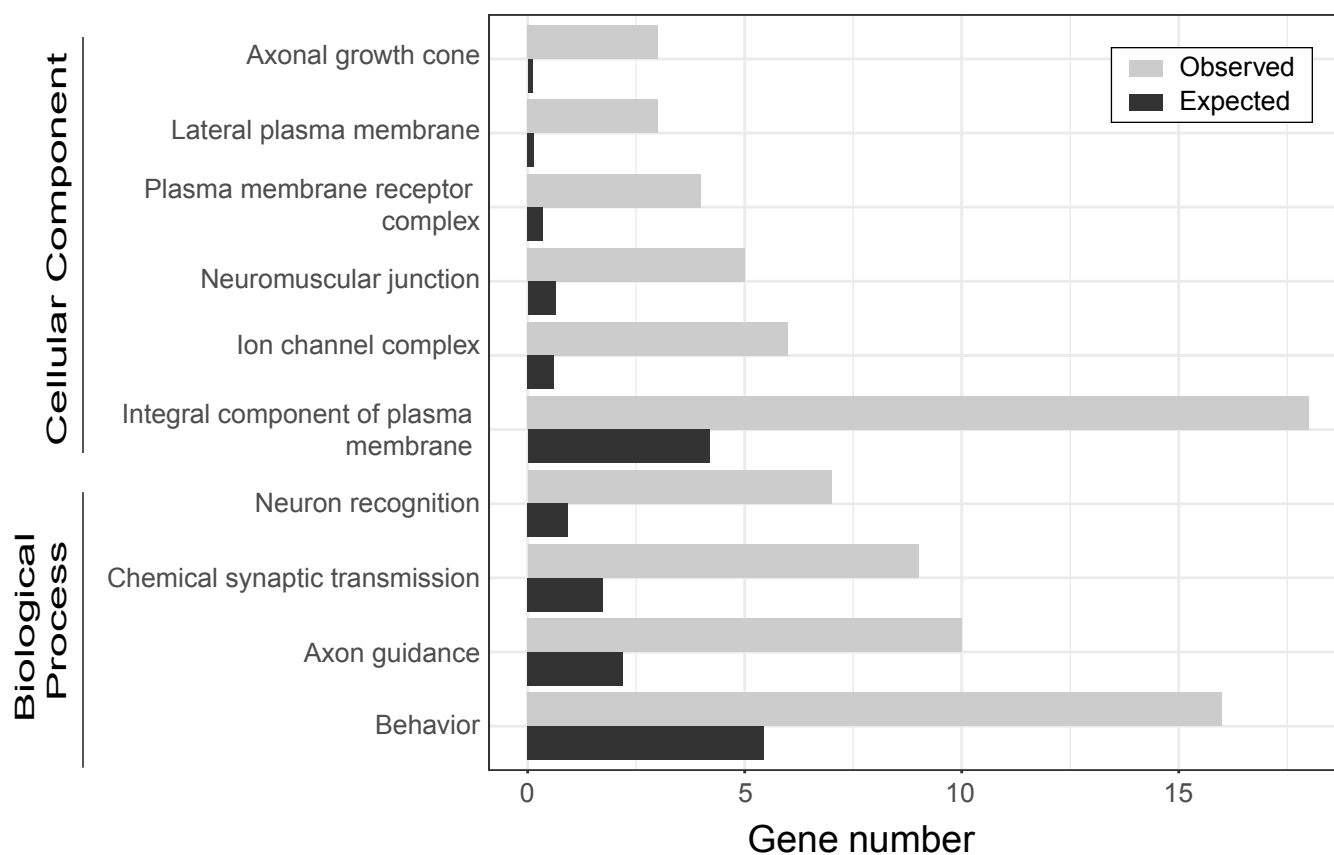

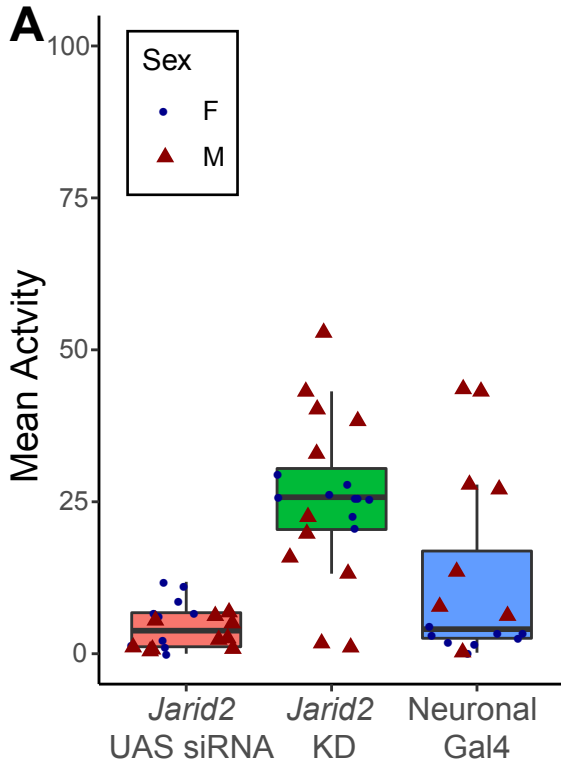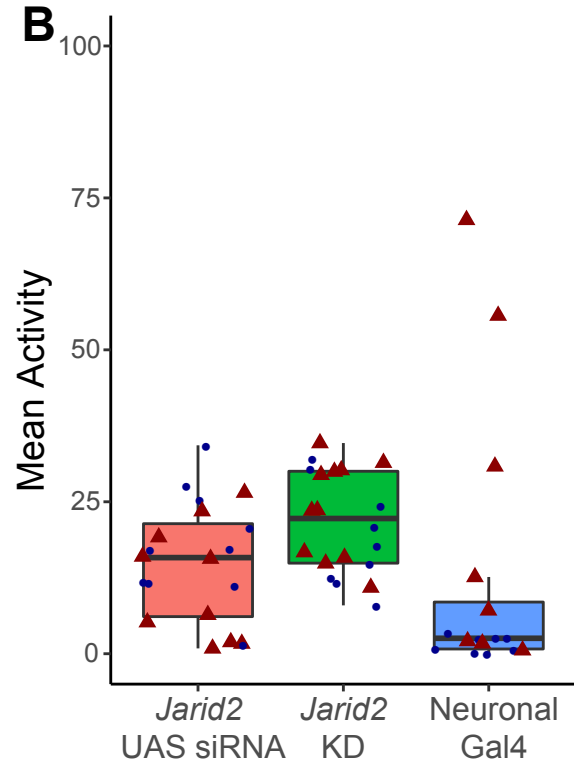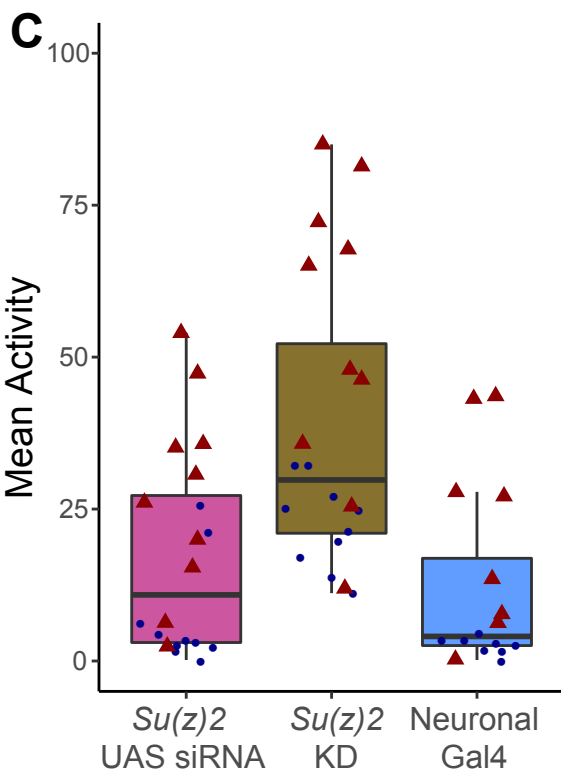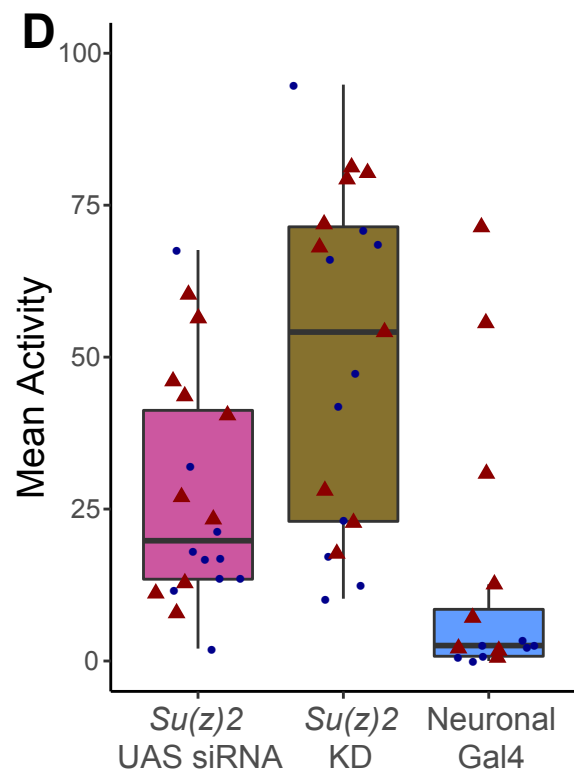

Source: https://www.biorxiv.org/content/10.1101/444380v2.full.pdf
