# Supplementary material for: Genetic networks underlying natural variation in basal and induced activity levels in Drosophila melanogaster
Source: bioRxiv preprint, doi:10.1101/444380, version 2 (2019-08-13)
Supplement: Supplemental Table S3 [file 444380_file11.xlsx]

## Sheet: Summary data as submitted for G
Basal Activity	Male	Female		Induced Activity	Male	Female
21	85.45	50.125		21	67.1944	53.5492
26	20.025	12.3833		26	48.6991	45.3788
28	32.0972	28		28	51.3194	50.0139
31	19.8333	12.7738		31	53.9062	39.6726
40	1.3125	0.760417		38	110.741	101.295
41	22.787	4.63889		40	4.00521	4.55208
42	22.8333	17.4583		41	80.6481	75.5046
45	2.83333	2.96875		42	78.1875	40.8708
49	125.933	27.7917		45	18.6302	12.0677
57	144.483	39.0917		48	41.6417	32.9583
59	29.8333	6.2		49	92.7625	89.7083
69	8.58333	11.375		59	22.5917	11.725
73	41.65	23.6417		69	48.4236	49.9844
83	4.86667	40.35		73	80.0292	55.3875
85	17.4333	36.4917		83	35.0625	47.1833
88	80.4848	3.2		85	29.8958	33.2542
93	NA	30.9083		88	48.1458	18.75
100	21.6583	9.75833		93	63.2167	52.7917
101	34.725	1.50833		100	72.5458	59.1583
105	15.9083	1.29167		101	14.225	10.9792
109	33.2	1.925		105	42.3073	36.9833
129	4.82727	9		129	35.0083	34.3917
138	2.05	2.24167		138	18.1833	30.7625
142	59.25	11.4167		142	60.6218	24.9191
149	62.85	22.775		149	90.8333	68.9917
153	18.2708	36.9167		153	125.24	112.03
158	9.3	2.66667		158	17.0167	16.6125
161	54.8818	40.1091		177	75.8417	22.5083
177	121.375	29.2167		181	17.9125	24.375
181	5.48333	8.75833		195	15.0708	24.8542
195	0.675	NA		227	47.5208	49.5179
227	29.2083	3		228	50.1583	4.22917
228	126.542	2.60833		229	54.9958	46.1917
229	8.54167	7.49167		233	38.275	35.4917
233	57.175	16.9583		256	4.17262	26.8
235	60.2	12.2417		287	52.037	22.5139
287	24.0741	11.4444		301	104.188	101.829
301	42.9083	42.225		304	6.01667	28.6667
304	2.56667	21.0833		306	37.7913	32.8478
306	6.25	18.7083		307	22.85	15.2917
307	6.77	2.07		309	30.4083	49.6542
309	7.29167	30.975		310	52.5708	55.1759
310	32.2917	9.34259		313	32.9955	14.9773
313	30.8417	23.325		315	15.6667	12.2409
315	1.96296	1.2		317	95.7478	101.765
317	2.35	2.4		318	46.6167	75.4125
318	2.7	4.95833		320	3.86667	1.21667
320	5.71667	0.666667		321	76.7	58.2348
321	78.5273	32.1182		324	52.256	44.8274
324	39.1071	4.77381		332	59.4375	15.2604
332	53.6771	9.35417		335	10.0625	3.09583
335	16.175	1.25		336	21.0595	8.97083
336	9.07143	5.625		338	22.0894	20.8478
338	17.3959	9.52857		340	11.2292	14.8542
340	70.6167	24.3417		350	11.2292	14.8542
350	70.6167	24.3417		352	54.724	26.9491
352	100.01	6.89815		357	34.7042	34.7583
357	58.1417	15.65		358	83.9792	30.6167
358	49.3273	11.2818		359	38.7083	34.3875
359	9.58333	32.0583		360	79.6435	42.1713
360	30.7685	15.9259		361	58.775	64.4208
361	42.4583	42.35		362	13.5083	25.7833
362	1.94167	14.125		365	24.8458	37.5625
365	4.60833	27.1833		367	71.8152	NA
367	9.80208	NA		370	57.2375	41.05
370	56.575	3.51667		371	110.267	104.521
371	47.8917	57.6333		373	10.5774	13.7042
373	12.2381	16.9083		374	28.3708	37.1083
374	82.75	28.1667		375	20.875	32.5917
375	51.7917	22.2583		377	90.0609	106.035
377	26.8083	20.9667		379	17.5875	7.4625
379	10.225	0.766667		381	25.7958	13.5708
380	28.05	0.783333		382	45.2208	21.4833
381	28.05	0.783333		383	1.625	6.325
382	14.6333	1.225		386	73.3	68.8696
383	0.275	1.39167		390	12.5417	41.8583
390	1.09167	0.525		391	94.8792	54.6958
391	95.9	6.11667		395	17.3292	17.35
395	8.29167	25.2167		397	13.375	11.224
397	5.78571	1.375		399	91.2364	69.4591
399	6.91667	26.375		405	61.8708	62.4833
405	50.1455	42.0091		406	83.8273	46.2273
406	68.0333	43.675		409	10.0958	8.90278
409	11.3333	3.97222		426	1.83333	3.98333
426	8.5	1.49167		427	15.525	13.7
427	11.5583	8.69167		443	70.1296	41.2454
439	3.80833	1.61667		461	95.2167	53.725
441	9.19167	5.35		486	48.475	23.8679
443	33.2917	31.2167		492	14.048	19.668
461	102.508	21.975		502	56.4462	48.65
486	94.7417	6.35		505	31.6528	11.6028
492	6.71667	10.0333		508	38.9958	41.35
502	67.3417	6.4		509	51.0577	38.7462
505	62.0917	12.225		513	13.5125	6.675
508	28.975	3.15		528	10.9708	19.375
509	53.8417	8.775		530	11.8417	16.1958
513	54.8667	1.76667		535	60.5042	79.8833
528	4.13333	3.48333		555	20.8917	17.4458
530	9.44167	16.0917		559	36.2208	68.2125
535	25.4455	23.3909		589	25.7958	8.0375
555	15.7333	25.075		595	80.2542	55.1958
559	15.675	30.9167		596	37.2875	48.3083
589	17.2	1.28333		627	NA	8.57639
595	85.8333	58.55		634	36.1125	20.7958
596	15.3667	45.4417		639	53.45	38.5636
627	NA	8.90278		703	15.9417	38.2167
634	28.1583	5.675		705	NA	26.858
639	10.3182	6.44545		707	69.5261	89.613
703	9.43333	7.525		714	9.44583	14.6875
705	NA	22.5729		716	107.2	53.913
707	29.6417	44.3583		727	12.8583	NA
714	2.45	2.99167		737	9.53646	21.3208
716	5.71667	11.0333		738	110.004	94.8667
737	0.572917	1.25		748	111.417	81.0833
738	25.05	37.0167		757	89.8083	79.0667
757	34.775	10.375		761	57.9292	50.6833
761	5.78333	28.925		765	103.379	86.8667
765	16.275	6.85		774	18.425	28.3792
774	1.94167	4.78333		783	58.713	87.313
783	8.49167	32.475		786	32.7792	18.3208
786	7.47273	3.13636		787	88.4	86.2458
787	25.0833	28.4917		790	37.8625	12.65
790	23.4	5.125		796	75.6	122.008
796	38.7	56.65		799	56.4	66.7542
799	10.2571	3.4		801	94.4792	81.6125
801	51.05	43.5167		805	65.5167	22.5292
805	45.275	5.25833		808	155.245	133.94
808	60.42	53.93		810	88.8167	77.2042
810	19.3417	25.95		812	37.6019	48.4333
812	1.63889	8.28333		819	55.1958	62.4125
818	93.9364	13.8364		820	9.40833	10.7333
819	8.85	10.15		821	100.425	61.1667
820	3.99167	7.03333		822	78.9227	49.7
821	51.9167	41.3167		832	38.225	40.4792
822	40.5083	26.4333		837	NA	59.9333
832	13.85	8.675		843	12.0417	7.94167
837	NA	15.0833		849	24.3042	31.4792
843	3.65741	3.13333		852	96.8385	84.4115
849	0.566667	1.55833		853	34.775	41.9167
850	63.3333	15.463		855	35.4	47.2333
852	14.9062	4.13542		857	27.2792	16.0583
853	3.58333	33.6667		859	88.5583	86.0324
855	19.6	40.525		879	86.9375	84.5375
857	11.875	1.025		882	23.9375	57.2417
859	32.1667	13.4444		887	62.7167	75.8167
879	7.91818	3.94545		890	50.2583	41.8208
882	13.625	2.975		892	19.0458	41.2417
887	1.48333	14.8333		897	125.358	133.929
890	45.9333	19.6417		900	95.4542	90.8417
892	3.375	2.50833		908	35.8458	33.4583
897	3.11667	7.05		913	20.5375	32.4458
900	24.0333	21.55
908	14.225	26.025
911	35.1	30.95
913	2.175	13.4583

## Sheet: Raw data
Activity/5min	ActivityTotal/2hrs	Genotype	Sex	Vial	Treatment
119.917	1439	21	F	1	0
117.25	1407	21	F	4	0
99.6667	1196	21	F	2	0			Treatment
95.8333	1150	21	F	3	0			0 = basal
18.0833	217	21	F	8	0			1 = induced
14.9167	179	21	F	10	0
10.5833	127	21	F	7	0
10.3333	124	21	F	5	0
9.91667	119	21	F	6	0
4.75	57	21	F	9	0
92.2917	2215	21	F	10	1
87.875	2109	21	F	4	1
73	1752	21	F	3	1
72.125	1731	21	F	2	1
69.5833	1670	21	F	1	1
50.5417	1213	21	F	8	1
38.625	927	21	F	7	1
33.75	810	21	F	10	1
26.3333	632	21	F	6	1
25.0417	601	21	F	5	1
19.875	477	21	F	9	1
14.4167	173	21	M	1	0
10.3333	124	21	M	2	0
1.75	21	21	M	3	0
10.9167	131	21	M	4	0
129.75	1557	21	M	5	0
111.667	1340	21	M	6	0
157.083	1885	21	M	7	0
164.417	1973	21	M	8	0
98.1667	1178	21	M	9	0
156	1872	21	M	10	0
113.833	2732	21	M	8	1
100.833	2420	21	M	5	1
91.75	2202	21	M	7	1
87.375	2097	21	M	6	1
70.8333	1700	21	M	9	1
44.7083	1073	21	M	4	1
39.2917	943	21	M	1	1
37.875	909	21	M	2	1
18.25	438	21	M	3	1
42	504	26	F	2	0
18.75	225	26	F	1	0
16.9167	203	26	F	3	0
13.75	165	26	F	4	0
11.75	141	26	F	9	0
8.25	99	26	F	6	0
5.33333	64	26	F	10	0
2.83333	34	26	F	7	0
2.25	27	26	F	8	0
2	24	26	F	5	0
98.2917	2359	26	F	1	1
92.0417	2209	26	F	2	1
81.1667	1948	26	F	4	1
75.5417	1813	26	F	10	1
47.9583	1151	26	F	9	1
46.375	1113	26	F	3	1
22.3333	536	26	F	10	1
10.2083	245	26	F	6	1
9.5	228	26	F	5	1
8.95833	215	26	F	7	1
6.79167	163	26	F	8	1
0	0	26	M	1	0
4.75	57	26	M	2	0
19.3333	232	26	M	3	0
1.83333	22	26	M	4	0
2.5	30	26	M	5	0
39.4167	473	26	M	6	0
37.75	453	26	M	7	0
38.4167	461	26	M	8	0
16.3333	196	26	M	9	0
39.9167	479	26	M	10	0
84.7083	2033	26	M	7	1
84.625	2031	26	M	6	1
73.2083	1757	26	M	8	1
69.75	1674	26	M	5	1
53.2917	1279	26	M	9	1
26.7917	643	26	M	4	1
26	624	26	M	3	1
16.625	399	26	M	2	1
3.29167	79	26	M	1	1
39.0833	469	28	F	3	0
34.3333	412	28	F	4	0
32.3333	388	28	F	6	0
23.6667	284	28	F	2	0
22.75	273	28	F	5	0
15.8333	190	28	F	1	0
72.9167	1750	28	F	3	1
61.7917	1483	28	F	4	1
46.875	1125	28	F	5	1
45.25	1086	28	F	6	1
41.3333	992	28	F	2	1
31.9167	766	28	F	1	1
28.4167	341	28	M	1	0
22.6667	272	28	M	2	0
33.6667	404	28	M	3	0
32.5	390	28	M	4	0
42.4167	509	28	M	5	0
32.9167	395	28	M	6	0
72.25	1734	28	M	2	1
53.75	1290	28	M	4	1
52.75	1266	28	M	3	1
44.7083	1073	28	M	5	1
43.75	1050	28	M	1	1
40.7083	977	28	M	6	1
30.4167	365	31	F	5	0
27.9167	335	31	F	6	0
12.4167	149	31	F	1	0
11.9167	143	31	F	7	0
4.08333	49	31	F	3	0
2.66667	32	31	F	2	0
0	0	31	F	4	0
81.5	1956	31	F	6	1
75.5833	1814	31	F	7	1
62.5	1500	31	F	5	1
29.9167	718	31	F	1	1
14.7083	353	31	F	3	1
13.5	324	31	F	2	1
0	0	31	F	4	1
45.5	546	31	M	1	0
29.9167	359	31	M	2	0
43.6667	524	31	M	3	0
32.8333	394	31	M	4	0
0.5	6	31	M	5	0
0.5	6	31	M	6	0
0.416667	5	31	M	7	0
5.33333	64	31	M	8	0
115.042	2761	31	M	3	1
92.7083	2225	31	M	1	1
90.375	2169	31	M	2	1
89.125	2139	31	M	4	1
38.7083	929	31	M	8	1
2.83333	68	31	M	5	1
1.70833	41	31	M	7	1
0.75	18	31	M	6	1
115	2760	38	F	1	1
106.75	2562	38	F	5	1
106.708	2561	38	F	3	1
105.792	2539	38	F	10	1
104.583	2510	38	F	4	1
101.375	2433	38	F	9	1
99.7083	2393	38	F	8	1
98.375	2361	38	F	10	1
95.8333	2300	38	F	7	1
90.9583	2183	38	F	6	1
89.1667	2140	38	F	2	1
151.667	3640	38	M	1	1
136	3264	38	M	2	1
134.667	3232	38	M	9	1
127	3048	38	M	8	1
122	2928	38	M	7	1
120.458	2891	38	M	5	1
97.9167	2350	38	M	4	1
82.2083	1973	38	M	6	1
24.75	594	38	M	3	1
2.08333	25	40	F	2	0
1	12	40	F	3	0
0.75	9	40	F	5	0
0.75	9	40	F	6	0
0.666667	8	40	F	1	0
0.5	6	40	F	7	0
0.333333	4	40	F	4	0
0	0	40	F	8	0
7.79167	187	40	F	4	1
7.66667	184	40	F	6	1
6.375	153	40	F	2	1
5.70833	137	40	F	1	1
4.04167	97	40	F	7	1
3.75	90	40	F	8	1
0.625	15	40	F	5	1
0.458333	11	40	F	3	1
1.66667	20	40	M	1	0
0	0	40	M	2	0
0.666667	8	40	M	3	0
2.66667	32	40	M	4	0
1.5	18	40	M	5	0
1.33333	16	40	M	6	0
0.5	6	40	M	7	0
2.16667	26	40	M	8	0
5.29167	127	40	M	7	1
4.75	114	40	M	1	1
4.75	114	40	M	4	1
4.66667	112	40	M	5	1
4.5	108	40	M	3	1
3.70833	89	40	M	6	1
3.41667	82	40	M	8	1
0.958333	23	40	M	2	1
11.4167	137	41	F	4	0
7.5	90	41	F	9	0
7.41667	89	41	F	1	0
4.33333	52	41	F	2	0
3.75	45	41	F	3	0
3.16667	38	41	F	8	0
3.08333	37	41	F	6	0
0.833333	10	41	F	7	0
0.25	3	41	F	5	0
87.25	2094	41	F	4	1
83.8333	2012	41	F	2	1
76.625	1839	41	F	1	1
76.125	1827	41	F	8	1
75.7917	1819	41	F	3	1
75	1800	41	F	9	1
70.1667	1684	41	F	5	1
68.125	1635	41	F	6	1
66.625	1599	41	F	7	1
34.8333	418	41	M	1	0
16.0833	193	41	M	2	0
39.75	477	41	M	3	0
24.0833	289	41	M	4	0
33.5833	403	41	M	5	0
28.3333	340	41	M	6	0
0.916667	11	41	M	7	0
2.08333	25	41	M	8	0
25.4167	305	41	M	9	0
111.417	2674	41	M	3	1
109.875	2637	41	M	6	1
100.833	2420	41	M	1	1
100.333	2408	41	M	5	1
91.125	2187	41	M	4	1
71.7917	1723	41	M	7	1
55.7083	1337	41	M	9	1
53.125	1275	41	M	8	1
31.625	759	41	M	2	1
26	312	42	F	5	0
24.0833	289	42	F	1	0
23.75	285	42	F	10	0
22.5	270	42	F	9	0
21.9167	263	42	F	8	0
18.1667	218	42	F	7	0
13.0833	157	42	F	4	0
11.6667	140	42	F	2	0
9	108	42	F	6	0
4.41667	53	42	F	3	0
67.4583	1619	42	F	10	1
55.25	1326	42	F	9	1
49.875	1197	42	F	5	1
47.5	1140	42	F	8	1
45.125	1083	42	F	7	1
43.5833	1046	42	F	1	1
36.625	879	42	F	6	1
33.5833	806	42	F	4	1
20.2083	485	42	F	3	1
9.5	228	42	F	2	1
31.1667	374	42	M	1	0
39.8333	478	42	M	2	0
21.6667	260	42	M	3	0
12	144	42	M	4	0
35.25	423	42	M	5	0
17.0833	205	42	M	6	0
26.1667	314	42	M	7	0
10.8333	130	42	M	8	0
23.8333	286	42	M	9	0
10.5	126	42	M	10	0
102.208	2453	42	M	1	1
94.0833	2258	42	M	9	1
89.1667	2140	42	M	2	1
87.3333	2096	42	M	3	1
82.0833	1970	42	M	6	1
73.1667	1756	42	M	5	1
69.375	1665	42	M	4	1
63.7083	1529	42	M	7	1
61.75	1482	42	M	10	1
59	1416	42	M	8	1
9.25	111	45	F	6	0
4.08333	49	45	F	2	0
3.5	42	45	F	8	0
1.91667	23	45	F	7	0
1.66667	20	45	F	3	0
1.41667	17	45	F	5	0
1.25	15	45	F	4	0
0.666667	8	45	F	1	0
31.0833	746	45	F	8	1
18.25	438	45	F	6	1
15.25	366	45	F	1	1
10.1667	244	45	F	3	1
9.25	222	45	F	7	1
7.5	180	45	F	5	1
2.83333	68	45	F	2	1
2.20833	53	45	F	4	1
5.5	66	45	M	1	0
5.66667	68	45	M	2	0
1.41667	17	45	M	3	0
0.916667	11	45	M	4	0
5.41667	65	45	M	5	0
2.16667	26	45	M	6	0
1	12	45	M	7	0
0.583333	7	45	M	8	0
34.125	819	45	M	5	1
26.1667	628	45	M	1	1
23.875	573	45	M	2	1
23.0417	553	45	M	3	1
17.7917	427	45	M	4	1
15.2083	365	45	M	7	1
7.33333	176	45	M	6	1
1.5	36	45	M	8	1
45.875	1101	48	F	1	1
39.4167	946	48	F	9	1
36.6667	880	48	F	10	1
36.4167	874	48	F	4	1
36.25	870	48	F	5	1
32.5833	782	48	F	2	1
30.0417	721	48	F	6	1
27.7083	665	48	F	7	1
23.3333	560	48	F	8	1
21.2917	511	48	F	3	1
57.2083	1373	48	M	9	1
56.8333	1364	48	M	10	1
55.2917	1327	48	M	1	1
50.125	1203	48	M	7	1
46.25	1110	48	M	4	1
40.5	972	48	M	3	1
36.1667	868	48	M	8	1
29.2917	703	48	M	6	1
23.5417	565	48	M	2	1
21.2083	509	48	M	5	1
36.25	435	49	F	8	0
34.5	414	49	F	4	0
32.1667	386	49	F	1	0
31.4167	377	49	F	7	0
29.5	354	49	F	5	0
25.25	303	49	F	3	0
24	288	49	F	2	0
22.1667	266	49	F	6	0
21.5	258	49	F	10	0
21.1667	254	49	F	9	0
134.292	3223	49	F	4	1
99.8333	2396	49	F	7	1
96.0833	2306	49	F	2	1
93.6667	2248	49	F	6	1
89.1667	2140	49	F	8	1
84.625	2031	49	F	5	1
84.2083	2021	49	F	1	1
81.2917	1951	49	F	10	1
79.4583	1907	49	F	3	1
54.4583	1307	49	F	9	1
125.833	1510	49	M	1	0
187.833	2254	49	M	2	0
143.917	1727	49	M	3	0
91.5833	1099	49	M	4	0
127.333	1528	49	M	5	0
133.417	1601	49	M	6	0
63.25	759	49	M	7	0
124.417	1493	49	M	8	0
110.833	1330	49	M	9	0
150.917	1811	49	M	10	0
107.917	2590	49	M	2	1
106.792	2563	49	M	5	1
104.375	2505	49	M	3	1
97.75	2346	49	M	1	1
95.875	2301	49	M	10	1
90.9583	2183	49	M	6	1
87	2088	49	M	8	1
82.9583	1991	49	M	4	1
78.9167	1894	49	M	9	1
75.0833	1802	49	M	7	1
51.9167	623	57	F	9	0
48.5833	583	57	F	8	0
46.4167	557	57	F	3	0
43.3333	520	57	F	6	0
38.3333	460	57	F	4	0
37.6667	452	57	F	1	0
34.5	414	57	F	7	0
32.5833	391	57	F	2	0
31.6667	380	57	F	5	0
25.9167	311	57	F	10	0
166.333	1996	57	M	1	0
159.833	1918	57	M	2	0
96.3333	1156	57	M	3	0
146.083	1753	57	M	4	0
85.5	1026	57	M	5	0
149.167	1790	57	M	6	0
158.417	1901	57	M	7	0
150.583	1807	57	M	8	0
155.917	1871	57	M	9	0
176.667	2120	57	M	10	0
10.4167	125	59	F	5	0
10.0833	121	59	F	1	0
8.75	105	59	F	9	0
8	96	59	F	8	0
7.25	87	59	F	2	0
4.91667	59	59	F	3	0
3.58333	43	59	F	6	0
3.25	39	59	F	10	0
2.91667	35	59	F	4	0
2.83333	34	59	F	7	0
17.7917	367	59	F	3	1
16.9583	353	59	F	2	1
14.875	317	59	F	9	1
14.125	262	59	F	4	1
13.6667	272	59	F	1	1
11.4167	207	59	F	7	1
10.1667	206	59	F	8	1
7.54167	146	59	F	5	1
6.375	112	59	F	6	1
4.33333	85	59	F	10	1
15.25	183	59	M	1	0
21.5	258	59	M	2	0
47.9167	575	59	M	3	0
26.5	318	59	M	4	0
13.5	162	59	M	5	0
51.25	615	59	M	6	0
42.75	513	59	M	7	0
22.1667	266	59	M	8	0
34	408	59	M	9	0
23.5	282	59	M	10	0
43.75	1021	59	M	7	1
30.5833	707	59	M	6	1
28.9583	685	59	M	8	1
25.875	595	59	M	3	1
19.375	438	59	M	10	1
18.4167	423	59	M	9	1
18.1667	413	59	M	2	1
16.25	379	59	M	4	1
14.5833	298	59	M	1	1
9.95833	217	59	M	5	1
21.3333	256	69	F	6	0
16.75	201	69	F	1	0
14.5833	175	69	F	7	0
14.0833	169	69	F	2	0
9.58333	115	69	F	5	0
9.16667	110	69	F	4	0
3.41667	41	69	F	8	0
2.08333	25	69	F	3	0
75.9583	1823	69	F	1	1
61.1667	1468	69	F	6	1
60.25	1446	69	F	4	1
56.1667	1348	69	F	8	1
45.75	1098	69	F	5	1
40.125	963	69	F	7	1
32.5	780	69	F	2	1
27.9583	671	69	F	3	1
11.25	135	69	M	1	0
4.75	57	69	M	2	0
5.25	63	69	M	3	0
4	48	69	M	4	0
12.1667	146	69	M	5	0
14.0833	169	69	M	6	0
61.625	1479	69	M	4	1
55.75	1338	69	M	6	1
47.6667	1144	69	M	5	1
47.4167	1138	69	M	1	1
46.0833	1106	69	M	2	1
32	768	69	M	3	1
30.5833	367	73	F	9	0
30.0833	361	73	F	8	0
28.6667	344	73	F	1	0
25.25	303	73	F	4	0
23.9167	287	73	F	10	0
23.75	285	73	F	7	0
22.6667	272	73	F	6	0
21.8333	262	73	F	3	0
18.3333	220	73	F	2	0
11.3333	136	73	F	5	0
65.0417	1561	73	F	3	1
64.8333	1556	73	F	8	1
62.2917	1495	73	F	9	1
61.0417	1465	73	F	1	1
60.5417	1453	73	F	6	1
59.25	1422	73	F	10	1
56.1667	1348	73	F	7	1
45.5	1092	73	F	2	1
39.875	957	73	F	4	1
39.3333	944	73	F	5	1
53.5	642	73	M	1	0
34.5	414	73	M	2	0
41	492	73	M	3	0
50.3333	604	73	M	4	0
48.0833	577	73	M	5	0
46.1667	554	73	M	6	0
50.0833	601	73	M	7	0
57.0833	685	73	M	8	0
24.8333	298	73	M	9	0
10.9167	131	73	M	10	0
108.25	2598	73	M	5	1
97.5417	2341	73	M	1	1
93.25	2238	73	M	8	1
86.0417	2065	73	M	9	1
81.4167	1954	73	M	7	1
74.2917	1783	73	M	6	1
73.3333	1760	73	M	2	1
71.0833	1706	73	M	3	1
68.9583	1655	73	M	4	1
46.125	1107	73	M	10	1
63.5833	763	83	F	2	0
62.4167	749	83	F	1	0
53.1667	638	83	F	8	0
50.5	606	83	F	4	0
36.4167	437	83	F	6	0
36.3333	436	83	F	9	0
27.6667	332	83	F	10	0
27.5833	331	83	F	7	0
23.8333	286	83	F	5	0
22	264	83	F	3	0
66.5833	1598	83	F	6	1
58.2917	1399	83	F	1	1
58	1392	83	F	3	1
57.2917	1375	83	F	4	1
51.4583	1235	83	F	5	1
41.3333	992	83	F	8	1
41.2083	989	83	F	2	1
39.9167	958	83	F	7	1
33.4583	803	83	F	9	1
24.2917	583	83	F	10	1
11.4167	137	83	M	1	0
6.58333	79	83	M	2	0
3.58333	43	83	M	3	0
5	60	83	M	4	0
15.6667	188	83	M	5	0
2.08333	25	83	M	6	0
1.5	18	83	M	7	0
2.75	33	83	M	8	0
0.0833333	1	83	M	9	0
0	0	83	M	10	0
70.5417	1693	83	M	1	1
53.9167	1294	83	M	2	1
44.625	1071	83	M	3	1
38.9167	934	83	M	10	1
34.2083	821	83	M	5	1
31.5417	757	83	M	6	1
31	744	83	M	8	1
17.9583	431	83	M	4	1
15.125	363	83	M	9	1
12.7917	307	83	M	7	1
44.4167	533	85	F	1	0
44.1667	530	85	F	9	0
40.4167	485	85	F	6	0
40.0833	481	85	F	10	0
37.3333	448	85	F	4	0
35.6667	428	85	F	7	0
34.6667	416	85	F	2	0
34	408	85	F	5	0
31.75	381	85	F	3	0
22.4167	269	85	F	8	0
41.2917	991	85	F	8	1
40.2917	967	85	F	2	1
35.8333	860	85	F	4	1
34.8333	836	85	F	10	1
34.5833	830	85	F	1	1
32.75	786	85	F	7	1
30.875	741	85	F	3	1
30.8333	740	85	F	9	1
26.2083	629	85	F	6	1
25.0417	601	85	F	5	1
10.75	129	85	M	1	0
11.4167	137	85	M	2	0
23.1667	278	85	M	3	0
12.75	153	85	M	4	0
10.0833	121	85	M	5	0
18.5833	223	85	M	6	0
21.4167	257	85	M	7	0
23.6667	284	85	M	8	0
12.9167	155	85	M	9	0
29.5833	355	85	M	10	0
39.375	945	85	M	3	1
38.7917	931	85	M	8	1
37.2083	893	85	M	4	1
35	840	85	M	9	1
27.6667	664	85	M	10	1
26.9167	646	85	M	2	1
26.625	639	85	M	6	1
26.4167	634	85	M	5	1
26.0833	626	85	M	7	1
14.875	357	85	M	1	1
4	44	88	F	3	0
3.90909	43	88	F	2	0
3.09091	34	88	F	5	0
2.90909	32	88	F	4	0
2.09091	23	88	F	1	0
27.25	654	88	F	2	1
25.75	618	88	F	4	1
21.5833	518	88	F	3	1
12.1667	292	88	F	5	1
7	168	88	F	1	1
68.2727	751	88	M	1	0
82.7273	910	88	M	2	0
159.364	1753	88	M	3	0
50.0909	551	88	M	4	0
57.7273	635	88	M	5	0
64.7273	712	88	M	6	0
80.7917	1939	88	M	2	1
59.75	1434	88	M	6	1
55.75	1338	88	M	1	1
45.125	1083	88	M	3	1
26.125	627	88	M	4	1
21.3333	512	88	M	5	1
55.0833	661	93	F	1	0
44.6667	536	93	F	8	0
39.25	471	93	F	6	0
28.8333	346	93	F	5	0
28.75	345	93	F	4	0
26.4167	317	93	F	2	0
24.1667	290	93	F	9	0
22.8333	274	93	F	3	0
20.0833	241	93	F	10	0
19	228	93	F	7	0
73.0833	1754	93	F	4	1
67.75	1626	93	F	10	1
63.7083	1529	93	F	1	1
55.5	1332	93	F	2	1
54.5	1308	93	F	8	1
54.375	1305	93	F	6	1
44.9167	1078	93	F	3	1
44.2917	1063	93	F	9	1
35.8333	860	93	F	7	1
33.9583	815	93	F	5	1
16.1667	194	93	M	1	0
36.25	435	93	M	2	0
41.1667	494	93	M	3	0
31	372	93	M	4	0
22.9167	275	93	M	5	0
30	360	93	M	6	0
22.0833	265	93	M	7	0
50.8333	610	93	M	8	0
45.4167	545	93	M	9	0
31.25	375	93	M	10	0
85.3333	2048	93	M	8	1
84.625	2031	93	M	9	1
80.9167	1942	93	M	3	1
63.625	1527	93	M	5	1
62.0833	1490	93	M	7	1
57.5	1380	93	M	4	1
53.625	1287	93	M	2	1
51.5	1236	93	M	1	1
51	1224	93	M	10	1
41.9583	1007	93	M	6	1
36.5	438	100	F	9	0
17.1667	206	100	F	6	0
14.4167	173	100	F	10	0
10.75	129	100	F	2	0
6.5	78	100	F	3	0
4.91667	59	100	F	8	0
3.25	39	100	F	7	0
2.41667	29	100	F	5	0
1.58333	19	100	F	4	0
0.0833333	1	100	F	1	0
96.2083	2309	100	F	9	1
71.4583	1715	100	F	3	1
66.7917	1603	100	F	8	1
63	1512	100	F	2	1
58.0833	1394	100	F	10	1
57.4583	1379	100	F	5	1
51.7917	1243	100	F	7	1
50.0833	1202	100	F	6	1
46.625	1119	100	F	4	1
30.0833	722	100	F	1	1
3.83333	46	100	M	1	0
33	396	100	M	2	0
21.75	261	100	M	3	0
11.0833	133	100	M	4	0
28.4167	341	100	M	5	0
35.0833	421	100	M	6	0
21.3333	256	100	M	7	0
18	216	100	M	8	0
26.9167	323	100	M	9	0
17.1667	206	100	M	10	0
123.167	2956	100	M	5	1
101.083	2426	100	M	8	1
99.375	2385	100	M	7	1
81.9583	1967	100	M	6	1
76.4167	1834	100	M	9	1
68.9167	1654	100	M	2	1
66.8333	1604	100	M	4	1
43.3333	1040	100	M	10	1
36.75	882	100	M	1	1
27.625	663	100	M	3	1
3.5	42	101	F	10	0
2.66667	32	101	F	4	0
1.83333	22	101	F	6	0
1.66667	20	101	F	3	0
1.41667	17	101	F	2	0
1.41667	17	101	F	5	0
1.41667	17	101	F	7	0
0.75	9	101	F	1	0
0.25	3	101	F	8	0
0.166667	2	101	F	9	0
17.7083	425	101	F	2	1
14.25	342	101	F	8	1
13.875	333	101	F	3	1
13.2917	319	101	F	4	1
11.375	273	101	F	10	1
9.91667	238	101	F	9	1
9.70833	233	101	F	1	1
9	216	101	F	5	1
7.875	189	101	F	6	1
2.79167	67	101	F	7	1
3	36	101	M	1	0
68.9167	827	101	M	2	0
34.9167	419	101	M	3	0
15.6667	188	101	M	4	0
0.5	6	101	M	5	0
46.25	555	101	M	6	0
75.4167	905	101	M	7	0
55.8333	670	101	M	8	0
26	312	101	M	9	0
20.75	249	101	M	10	0
28.2917	679	101	M	4	1
26.5	636	101	M	7	1
17.9583	431	101	M	10	1
17.4167	418	101	M	9	1
13.375	321	101	M	3	1
11.3333	272	101	M	8	1
9.83333	236	101	M	1	1
8.5	204	101	M	2	1
6.125	147	101	M	6	1
2.91667	70	101	M	5	1
4.33333	52	105	F	3	0
3.66667	44	105	F	5	0
1.83333	22	105	F	8	0
1.5	18	105	F	6	0
0.666667	8	105	F	10	0
0.25	3	105	F	1	0
0.25	3	105	F	2	0
0.25	3	105	F	4	0
0.166667	2	105	F	7	0
0	0	105	F	9	0
56.9583	1367	105	F	4	1
52.9583	1271	105	F	1	1
46.9167	1126	105	F	8	1
45.125	1083	105	F	3	1
34.5	828	105	F	7	1
32.7083	785	105	F	10	1
31.875	765	105	F	6	1
28.2083	677	105	F	5	1
20.9167	502	105	F	2	1
19.6667	472	105	F	9	1
5.16667	62	105	M	1	0
29.75	357	105	M	2	0
16.25	195	105	M	3	0
3.75	45	105	M	4	0
29	348	105	M	5	0
12.0833	145	105	M	6	0
55.1667	662	105	M	7	0
7.91667	95	105	M	8	0
0	0	105	M	9	0
0	0	105	M	10	0
56.3333	1352	105	M	7	1
53.75	1290	105	M	2	1
53.1667	1276	105	M	5	1
48.6667	1168	105	M	3	1
46.25	1110	105	M	6	1
28.9167	694	105	M	4	1
26.1667	628	105	M	1	1
25.2083	605	105	M	8	1
3.58333	43	109	F	5	0
3.41667	41	109	F	2	0
2.25	27	109	F	1	0
2.25	27	109	F	3	0
2.16667	26	109	F	6	0
1.83333	22	109	F	7	0
1.75	21	109	F	9	0
0.916667	11	109	F	8	0
0.833333	10	109	F	10	0
0.25	3	109	F	4	0
23.6667	284	109	M	1	0
41.0833	493	109	M	2	0
21.0833	253	109	M	3	0
10.8333	130	109	M	4	0
36.3333	436	109	M	5	0
92.3333	1108	109	M	6	0
16.1667	194	109	M	7	0
18.5833	223	109	M	8	0
13.3333	160	109	M	9	0
58.5833	703	109	M	10	0
23.3636	257	129	F	6	0
22.7273	250	129	F	10	0
11	121	129	F	1	0
6.72727	74	129	F	3	0
5.81818	64	129	F	8	0
5.63636	62	129	F	4	0
4.72727	52	129	F	9	0
4.45455	49	129	F	2	0
3.18182	35	129	F	5	0
2.36364	26	129	F	7	0
64.375	1545	129	F	6	1
56.7917	1363	129	F	4	1
55.5	1332	129	F	1	1
38.375	921	129	F	10	1
32.625	783	129	F	8	1
20.5417	493	129	F	3	1
20.2917	487	129	F	2	1
19.4583	467	129	F	7	1
18.0417	433	129	F	9	1
17.9167	430	129	F	5	1
2.27273	25	129	M	1	0
3.63636	40	129	M	2	0
4.54545	50	129	M	3	0
1.63636	18	129	M	4	0
7.63636	84	129	M	5	0
6.27273	69	129	M	6	0
0.545455	6	129	M	7	0
8.36364	92	129	M	8	0
11.9091	131	129	M	9	0
1.45455	16	129	M	10	0
69.9167	1678	129	M	3	1
48.875	1173	129	M	9	1
46.9583	1127	129	M	5	1
43.1667	1036	129	M	1	1
36.125	867	129	M	6	1
35.5	852	129	M	8	1
29.0833	698	129	M	7	1
20.3333	488	129	M	10	1
11.25	270	129	M	2	1
8.875	213	129	M	4	1
6.41667	77	138	F	3	0
4.66667	56	138	F	8	0
3.75	45	138	F	1	0
3.41667	41	138	F	10	0
2	24	138	F	2	0
1	12	138	F	7	0
0.833333	10	138	F	4	0
0.166667	2	138	F	6	0
0.166667	2	138	F	9	0
0	0	138	F	5	0
51.0417	1225	138	F	3	1
43.3333	1040	138	F	5	1
37.75	906	138	F	8	1
37.2083	893	138	F	2	1
33.75	810	138	F	1	1
31.0417	745	138	F	4	1
25.875	621	138	F	7	1
23.5	564	138	F	9	1
13.7917	331	138	F	10	1
10.3333	248	138	F	6	1
2.41667	29	138	M	1	0
2.16667	26	138	M	2	0
1.58333	19	138	M	3	0
0.333333	4	138	M	4	0
0.416667	5	138	M	5	0
6.5	78	138	M	6	0
0	0	138	M	7	0
4.58333	55	138	M	8	0
0.916667	11	138	M	9	0
1.58333	19	138	M	10	0
36.7917	883	138	M	1	1
27.6667	664	138	M	6	1
25.2917	607	138	M	2	1
18.5833	446	138	M	8	1
16.4583	395	138	M	5	1
14.0833	338	138	M	3	1
13.875	333	138	M	4	1
13.7083	329	138	M	9	1
8.29167	199	138	M	7	1
7.08333	170	138	M	10	1
32.0833	385	142	F	4	0
26.6667	320	142	F	2	0
10.0833	121	142	F	6	0
8.33333	100	142	F	3	0
6.08333	73	142	F	5	0
4.66667	56	142	F	1	0
1.83333	22	142	F	8	0
1.58333	19	142	F	7	0
42.9118	1459	142	F	2	1
41.3529	1406	142	F	3	1
29.5294	1004	142	F	6	1
20.6765	703	142	F	8	1
20.6471	702	142	F	4	1
19.5294	664	142	F	1	1
17.3824	591	142	F	5	1
7.32353	249	142	F	7	1
70.5	846	142	M	1	0
39.3333	472	142	M	2	0
65.5	786	142	M	3	0
44.3333	532	142	M	4	0
48.1667	578	142	M	5	0
88.0833	1057	142	M	6	0
58.8333	706	142	M	7	0
91.0294	3095	142	M	7	1
75.2647	2559	142	M	1	1
71.4706	2430	142	M	5	1
58.7353	1997	142	M	6	1
57.0294	1939	142	M	3	1
35.9118	1221	142	M	4	1
34.9118	1187	142	M	2	1
52.5833	631	149	F	9	0
36.5833	439	149	F	8	0
35.0833	421	149	F	4	0
16.5	198	149	F	3	0
16.25	195	149	F	1	0
16.0833	193	149	F	2	0
15.25	183	149	F	10	0
14.5	174	149	F	5	0
14.25	171	149	F	7	0
10.6667	128	149	F	6	0
101.792	2443	149	F	3	1
88.5	2124	149	F	2	1
78.5833	1886	149	F	7	1
76.0417	1825	149	F	1	1
70.9167	1702	149	F	5	1
67.625	1623	149	F	9	1
59.0833	1418	149	F	8	1
52.75	1266	149	F	4	1
50.875	1221	149	F	6	1
43.75	1050	149	F	10	1
53.6667	644	149	M	1	0
111.583	1339	149	M	2	0
31	372	149	M	3	0
94	1128	149	M	4	0
15.0833	181	149	M	5	0
67.75	813	149	M	6	0
18.5833	223	149	M	7	0
111.5	1338	149	M	8	0
91.3333	1096	149	M	9	0
34	408	149	M	10	0
118.292	2839	149	M	1	1
95.8333	2300	149	M	4	1
93.5417	2245	149	M	2	1
91.7917	2203	149	M	9	1
91	2184	149	M	8	1
89.4167	2146	149	M	5	1
86.9583	2087	149	M	10	1
84.0833	2018	149	M	6	1
80.2083	1925	149	M	3	1
77.2083	1853	149	M	7	1
45.25	543	153	F	3	0
43.9167	527	153	F	4	0
40	480	153	F	6	0
38.75	465	153	F	7	0
35.9167	431	153	F	2	0
31.5	378	153	F	5	0
23.0833	277	153	F	1	0
125.25	3006	153	F	1	1
118	2832	153	F	4	1
117.958	2831	153	F	7	1
114.125	2739	153	F	3	1
109.583	2630	153	F	6	1
103.333	2480	153	F	5	1
95.9583	2303	153	F	2	1
15.0833	181	153	M	1	0
14.5	174	153	M	2	0
11.0833	133	153	M	3	0
24.5	294	153	M	4	0
14.25	171	153	M	5	0
16.75	201	153	M	6	0
27	324	153	M	7	0
23	276	153	M	8	0
137.25	3294	153	M	7	1
136.083	3266	153	M	5	1
135	3240	153	M	2	1
128.75	3090	153	M	1	1
123.333	2960	153	M	8	1
122.75	2946	153	M	4	1
121.458	2915	153	M	3	1
97.2917	2335	153	M	6	1
7.75	93	158	F	7	0
4.66667	56	158	F	2	0
4.16667	50	158	F	8	0
4	48	158	F	4	0
1.41667	17	158	F	5	0
1.41667	17	158	F	6	0
1.16667	14	158	F	9	0
0.916667	11	158	F	1	0
0.75	9	158	F	3	0
0.416667	5	158	F	10	0
22.375	537	158	F	7	1
19.125	459	158	F	2	1
17.625	423	158	F	6	1
17.5833	422	158	F	4	1
17.4167	418	158	F	8	1
16.0417	385	158	F	3	1
15.4167	370	158	F	1	1
15.2083	365	158	F	9	1
14.7083	353	158	F	5	1
10.625	255	158	F	10	1
8.33333	100	158	M	1	0
29.5	354	158	M	2	0
0.75	9	158	M	3	0
13.6667	164	158	M	4	0
11.3333	136	158	M	5	0
3	36	158	M	6	0
4.66667	56	158	M	7	0
11.4167	137	158	M	8	0
3.41667	41	158	M	9	0
6.91667	83	158	M	10	0
34.0833	818	158	M	1	1
31.3333	752	158	M	2	1
24.875	597	158	M	5	1
15.5417	373	158	M	7	1
14.0417	337	158	M	6	1
12.75	306	158	M	8	1
11.5	276	158	M	4	1
11.125	267	158	M	10	1
10.2917	247	158	M	9	1
4.625	111	158	M	3	1
59.8182	658	161	F	5	0
57.3636	631	161	F	10	0
50.0909	551	161	F	1	0
48.9091	538	161	F	4	0
46.0909	507	161	F	3	0
46.0909	507	161	F	6	0
36.1818	398	161	F	8	0
36	396	161	F	7	0
12.9091	142	161	F	9	0
7.63636	84	161	F	2	0
26.3636	290	161	M	1	0
82.6364	909	161	M	2	0
54.2727	597	161	M	3	0
56.6364	623	161	M	4	0
66.1818	728	161	M	5	0
60.6364	667	161	M	6	0
39.1818	431	161	M	7	0
73.1818	805	161	M	8	0
7.63636	84	161	M	9	0
82.0909	903	161	M	10	0
50.4167	605	177	F	7	0
50.1667	602	177	F	6	0
49.0833	589	177	F	8	0
39.9167	479	177	F	10	0
34.0833	409	177	F	9	0
23	276	177	F	2	0
18.75	225	177	F	3	0
14	168	177	F	4	0
6.91667	83	177	F	5	0
5.83333	70	177	F	1	0
38.2917	919	177	F	7	1
37.5833	902	177	F	10	1
32.8333	788	177	F	2	1
29.375	705	177	F	6	1
23.375	561	177	F	9	1
19.1667	460	177	F	8	1
17.2917	415	177	F	3	1
14.5417	349	177	F	4	1
8.75	210	177	F	5	1
3.875	93	177	F	1	1
142.333	1708	177	M	1	0
138.5	1662	177	M	2	0
114.5	1374	177	M	3	0
133.167	1598	177	M	4	0
41.8333	502	177	M	5	0
109.083	1309	177	M	6	0
129.667	1556	177	M	7	0
142.333	1708	177	M	8	0
139.75	1677	177	M	9	0
122.583	1471	177	M	10	0
88.1667	2116	177	M	8	1
87.2083	2093	177	M	4	1
81	1944	177	M	10	1
78.875	1893	177	M	3	1
76.1667	1828	177	M	1	1
75.25	1806	177	M	5	1
71.25	1710	177	M	7	1
70.8333	1700	177	M	9	1
67.7083	1625	177	M	6	1
61.9583	1487	177	M	2	1
22.6667	272	181	F	8	0
18.5833	223	181	F	1	0
17.75	213	181	F	7	0
11	132	181	F	9	0
10.25	123	181	F	10	0
5.25	63	181	F	5	0
0.833333	10	181	F	3	0
0.75	9	181	F	4	0
0.5	6	181	F	2	0
0	0	181	F	6	0
45.9583	1103	181	F	2	1
33.2083	797	181	F	7	1
27.3333	656	181	F	8	1
24.7083	593	181	F	9	1
22.2917	535	181	F	1	1
21.2083	509	181	F	10	1
18.9167	454	181	F	5	1
17.25	414	181	F	6	1
16.5417	397	181	F	4	1
16.3333	392	181	F	3	1
0.833333	10	181	M	1	0
1.08333	13	181	M	2	0
0.0833333	1	181	M	3	0
0.916667	11	181	M	4	0
0.916667	11	181	M	5	0
2.66667	32	181	M	6	0
6.91667	83	181	M	7	0
0.5	6	181	M	8	0
3	36	181	M	9	0
37.9167	455	181	M	10	0
40.4583	971	181	M	10	1
30.125	723	181	M	1	1
29.375	705	181	M	7	1
15.3333	368	181	M	9	1
12.7917	307	181	M	2	1
11.2917	271	181	M	6	1
10.5833	254	181	M	5	1
10.5417	253	181	M	4	1
9.33333	224	181	M	8	1
9.29167	223	181	M	3	1
5.58333	67	195	F	6	0
2.83333	34	195	F	2	0
2.66667	32	195	F	8	0
2.58333	31	195	F	7	0
2.08333	25	195	F	4	0
1.33333	16	195	F	5	0
1.25	15	195	F	3	0
0.916667	11	195	F	9	0
0.5	6	195	F	1	0
2.25	27	195	F	10	0
37.25	894	195	F	2	1
28.375	681	195	F	6	1
26.9167	646	195	F	8	1
24.7083	593	195	F	3	1
24.3333	584	195	F	4	1
23	552	195	F	9	1
22.7917	547	195	F	5	1
22.5833	542	195	F	1	1
19.5833	470	195	F	10	1
19	456	195	F	7	1
1.41667	17	195	M	1	0
0.833333	10	195	M	2	0
0.666667	8	195	M	3	0
0.25	3	195	M	4	0
0.666667	8	195	M	5	0
0.0833333	1	195	M	6	0
0.0833333	1	195	M	7	0
1.75	21	195	M	8	0
0.833333	10	195	M	9	0
0.166667	2	195	M	10	0
26.9583	647	195	M	1	1
21.0833	506	195	M	3	1
16.2083	389	195	M	8	1
15.0833	362	195	M	10	1
14.2917	343	195	M	5	1
13.4583	323	195	M	4	1
12.625	303	195	M	7	1
11.1667	268	195	M	9	1
10.1667	244	195	M	6	1
9.66667	232	195	M	2	1
11.0833	133	227	F	1	0
4.66667	56	227	F	5	0
2.83333	34	227	F	4	0
1.16667	14	227	F	3	0
0.833333	10	227	F	2	0
0.25	3	227	F	7	0
0.166667	2	227	F	6	0
106.25	2550	227	F	1	1
79.7083	1913	227	F	4	1
55.4583	1331	227	F	5	1
40.8333	980	227	F	3	1
28.2917	679	227	F	7	1
21.4167	514	227	F	2	1
14.6667	352	227	F	6	1
55.4167	665	227	M	1	0
47.3333	568	227	M	2	0
16.6667	200	227	M	3	0
4.83333	58	227	M	4	0
36.5833	439	227	M	5	0
6.83333	82	227	M	6	0
57.1667	686	227	M	7	0
8.83333	106	227	M	8	0
93.5833	2246	227	M	1	1
55.9583	1343	227	M	7	1
49.625	1191	227	M	4	1
48.4167	1162	227	M	6	1
40.2917	967	227	M	3	1
36.9167	886	227	M	5	1
28.5417	685	227	M	2	1
26.8333	644	227	M	8	1
6.75	81	228	F	10	0
3.66667	44	228	F	1	0
3.58333	43	228	F	4	0
3.33333	40	228	F	6	0
3	36	228	F	5	0
2.08333	25	228	F	3	0
1.33333	16	228	F	7	0
1.16667	14	228	F	9	0
0.916667	11	228	F	2	0
0.25	3	228	F	8	0
9.5	228	228	F	1	1
7.45833	179	228	F	5	1
7.41667	178	228	F	10	1
5.79167	139	228	F	6	1
4.625	111	228	F	7	1
4.54167	109	228	F	4	1
2.125	51	228	F	3	1
0.541667	13	228	F	2	1
0.166667	4	228	F	8	1
0.125	3	228	F	9	1
57.5	690	228	M	1	0
118.083	1417	228	M	2	0
155.25	1863	228	M	3	0
165.25	1983	228	M	4	0
107	1284	228	M	5	0
104.333	1252	228	M	6	0
134.333	1612	228	M	7	0
180.167	2162	228	M	8	0
125.333	1504	228	M	9	0
118.167	1418	228	M	10	0
78.0833	1874	228	M	3	1
60.125	1443	228	M	10	1
59.875	1437	228	M	5	1
50.3333	1208	228	M	4	1
47.5	1140	228	M	8	1
47.4167	1138	228	M	1	1
44.875	1077	228	M	2	1
43.6667	1048	228	M	6	1
42.375	1017	228	M	7	1
27.3333	656	228	M	9	1
25.4167	305	229	F	2	0
11.6667	140	229	F	4	0
10	120	229	F	7	0
5.66667	68	229	F	10	0
5.25	63	229	F	1	0
4	48	229	F	3	0
3.91667	47	229	F	6	0
3	36	229	F	5	0
3	36	229	F	8	0
3	36	229	F	9	0
62.2917	1495	229	F	2	1
51	1224	229	F	4	1
50	1200	229	F	1	1
48.0417	1153	229	F	3	1
47.75	1146	229	F	7	1
47.0417	1129	229	F	8	1
46.3333	1112	229	F	5	1
42.75	1026	229	F	10	1
34.8333	836	229	F	9	1
31.875	765	229	F	6	1
9	108	229	M	1	0
3.91667	47	229	M	2	0
44.25	531	229	M	3	0
6.08333	73	229	M	4	0
5.25	63	229	M	5	0
2.83333	34	229	M	6	0
2.08333	25	229	M	7	0
5.58333	67	229	M	8	0
4.41667	53	229	M	9	0
2	24	229	M	10	0
74.7917	1795	229	M	3	1
61.4167	1474	229	M	9	1
58.625	1407	229	M	7	1
56.125	1347	229	M	8	1
55.7917	1339	229	M	1	1
51.9583	1247	229	M	10	1
51.0833	1226	229	M	4	1
49.8333	1196	229	M	6	1
47.5833	1142	229	M	2	1
42.75	1026	229	M	5	1
39.5	474	233	F	9	0
26.6667	320	233	F	5	0
20	240	233	F	1	0
17.6667	212	233	F	8	0
15.3333	184	233	F	2	0
14.3333	172	233	F	10	0
12.8333	154	233	F	6	0
8.41667	101	233	F	7	0
7.75	93	233	F	3	0
7.08333	85	233	F	4	0
44.0833	1058	233	F	8	1
43.9583	1055	233	F	3	1
43.3333	1040	233	F	5	1
40.8333	980	233	F	2	1
34.6667	832	233	F	4	1
34.375	825	233	F	6	1
33.0833	794	233	F	10	1
28.5	684	233	F	9	1
28.0417	673	233	F	1	1
24.0417	577	233	F	7	1
73.8333	886	233	M	1	0
71.6667	860	233	M	2	0
33.0833	397	233	M	3	0
40.25	483	233	M	4	0
116.667	1400	233	M	5	0
63.4167	761	233	M	6	0
19.75	237	233	M	7	0
38.3333	460	233	M	8	0
42.6667	512	233	M	9	0
72.0833	865	233	M	10	0
74.9583	1799	233	M	5	1
71.1667	1708	233	M	10	1
45.7917	1099	233	M	3	1
39.4583	947	233	M	6	1
38.7917	931	233	M	9	1
36.125	867	233	M	8	1
27.5	660	233	M	1	1
25.1667	604	233	M	2	1
13.2917	319	233	M	7	1
10.5	252	233	M	4	1
24.8333	298	235	F	8	0
19.5	234	235	F	3	0
15.5	186	235	F	7	0
13.25	159	235	F	2	0
13	156	235	F	6	0
12.25	147	235	F	5	0
8.08333	97	235	F	9	0
6.75	81	235	F	10	0
6.08333	73	235	F	1	0
3.16667	38	235	F	4	0
86.5833	1039	235	M	1	0
98.9167	1187	235	M	2	0
25.1667	302	235	M	3	0
20.6667	248	235	M	4	0
110.5	1326	235	M	5	0
103.5	1242	235	M	6	0
3.75	45	235	M	7	0
17.75	213	235	M	8	0
24.0833	289	235	M	9	0
111.083	1333	235	M	10	0
53.2917	1279	256	F	2	1
48.5417	1165	256	F	4	1
44.1667	1060	256	F	7	1
35.9167	862	256	F	3	1
24.25	582	256	F	8	1
17.9583	431	256	F	10	1
17.1667	412	256	F	6	1
12.0833	290	256	F	1	1
11.25	270	256	F	5	1
3.375	81	256	F	9	1
15.125	363	256	M	1	1
5.54167	133	256	M	7	1
3.375	81	256	M	3	1
2.25	54	256	M	6	1
1.83333	44	256	M	5	1
0.75	18	256	M	4	1
0.333333	8	256	M	2	1
23.75	285	287	F	4	0
20.25	243	287	F	1	0
17.5833	211	287	F	9	0
11.4167	137	287	F	7	0
10.3333	124	287	F	2	0
9.16667	110	287	F	3	0
9	108	287	F	6	0
1.33333	16	287	F	5	0
0.166667	2	287	F	8	0
42.6667	1024	287	F	9	1
33.6667	808	287	F	1	1
32.4583	779	287	F	3	1
27.5833	662	287	F	4	1
20	480	287	F	2	1
19.1667	460	287	F	6	1
14.375	345	287	F	7	1
7.58333	182	287	F	8	1
5.125	123	287	F	5	1
27.0833	325	287	M	1	0
4.41667	53	287	M	2	0
30.4167	365	287	M	3	0
16	192	287	M	4	0
48.25	579	287	M	5	0
36	432	287	M	6	0
20.4167	245	287	M	7	0
33.1667	398	287	M	8	0
0.916667	11	287	M	9	0
88	2112	287	M	5	1
81.9167	1966	287	M	3	1
81.6667	1960	287	M	8	1
70.5417	1693	287	M	6	1
54.125	1299	287	M	1	1
40.8333	980	287	M	7	1
29.4167	706	287	M	4	1
18.7083	449	287	M	2	1
3.125	75	287	M	9	1
55.8333	670	301	F	4	0
48	576	301	F	3	0
44.8333	538	301	F	2	0
44.3333	532	301	F	5	0
42.8333	514	301	F	1	0
42.25	507	301	F	8	0
37.1667	446	301	F	9	0
36.6667	440	301	F	10	0
36.5	438	301	F	6	0
33.8333	406	301	F	7	0
108.792	2611	301	F	4	1
107.958	2591	301	F	8	1
106.083	2546	301	F	3	1
106.042	2545	301	F	10	1
105.833	2540	301	F	9	1
103.542	2485	301	F	1	1
103.458	2483	301	F	2	1
94.4583	2267	301	F	5	1
93.5	2244	301	F	7	1
88.625	2127	301	F	6	1
2.91667	35	301	M	1	0
20.3333	244	301	M	2	0
14.9167	179	301	M	3	0
66.5	798	301	M	4	0
57	684	301	M	5	0
53.6667	644	301	M	6	0
26.5833	319	301	M	7	0
30.75	369	301	M	8	0
72.75	873	301	M	9	0
83.6667	1004	301	M	10	0
133.917	3214	301	M	10	1
130.542	3133	301	M	9	1
126.875	3045	301	M	5	1
124.583	2990	301	M	4	1
111.542	2677	301	M	7	1
103.167	2476	301	M	6	1
95.7083	2297	301	M	8	1
92.7917	2227	301	M	1	1
71.8333	1724	301	M	2	1
50.9167	1222	301	M	3	1
29.3333	352	304	F	1	0
24.75	297	304	F	2	0
23	276	304	F	7	0
22.8333	274	304	F	6	0
16.9167	203	304	F	5	0
16.4167	197	304	F	3	0
14.3333	172	304	F	4	0
53.0833	1274	304	F	6	1
31.1667	748	304	F	1	1
28.5	684	304	F	2	1
25.9167	622	304	F	3	1
24.875	597	304	F	7	1
23.7917	571	304	F	5	1
13.3333	320	304	F	4	1
4.41667	53	304	M	1	0
1.41667	17	304	M	2	0
0	0	304	M	3	0
5.75	69	304	M	4	0
3.91667	47	304	M	5	0
5	60	304	M	6	0
0.666667	8	304	M	7	0
3.75	45	304	M	8	0
0.166667	2	304	M	9	0
0.583333	7	304	M	10	0
17.9583	431	304	M	2	1
10.9167	262	304	M	6	1
7.29167	175	304	M	1	1
6.66667	160	304	M	4	1
5.58333	134	304	M	3	1
4.66667	112	304	M	8	1
2.625	63	304	M	9	1
1.91667	46	304	M	5	1
1.41667	34	304	M	10	1
1.125	27	304	M	7	1
40.5	486	306	F	2	0
36.0833	433	306	F	4	0
21.5	258	306	F	8	0
21.1667	254	306	F	7	0
20.5833	247	306	F	3	0
19.5833	235	306	F	1	0
10.0833	121	306	F	10	0
7.41667	89	306	F	5	0
7.33333	88	306	F	6	0
2.83333	34	306	F	9	0
57.3043	1318	306	F	4	1
51.5652	1186	306	F	5	1
41.4348	953	306	F	10	1
33.6087	773	306	F	8	1
31.9565	735	306	F	6	1
29.9565	689	306	F	7	1
26.8261	617	306	F	9	1
26.7826	616	306	F	1	1
16	368	306	F	2	1
13.0435	300	306	F	3	1
13.5833	163	306	M	1	0
1.58333	19	306	M	2	0
0.25	3	306	M	3	0
0.333333	4	306	M	4	0
5.25	63	306	M	5	0
0.333333	4	306	M	6	0
22.4167	269	306	M	7	0
81.6957	1879	306	M	8	1
51.3478	1181	306	M	3	1
47	1081	306	M	5	1
41.2174	948	306	M	9	1
37.7391	868	306	M	2	1
36.6087	842	306	M	1	1
26.913	619	306	M	7	1
22.9565	528	306	M	4	1
21.2609	489	306	M	6	1
11.1739	257	306	M	10	1
4.8	48	307	F	5	0
4	40	307	F	9	0
2.8	28	307	F	1	0
2.4	24	307	F	4	0
2.1	21	307	F	3	0
1.3	13	307	F	6	0
1.3	13	307	F	8	0
1.1	11	307	F	2	0
0.6	6	307	F	10	0
0.3	3	307	F	7	0
20.0833	482	307	F	5	1
18.125	435	307	F	4	1
17.5	420	307	F	9	1
16.7917	403	307	F	10	1
15.3333	368	307	F	6	1
15.2083	365	307	F	8	1
15.125	363	307	F	2	1
12.8333	308	307	F	1	1
11	264	307	F	7	1
10.9167	262	307	F	3	1
7.8	78	307	M	1	0
7.7	77	307	M	2	0
6.1	61	307	M	3	0
7.8	78	307	M	4	0
8.9	89	307	M	5	0
2.2	22	307	M	6	0
3	30	307	M	7	0
8.6	86	307	M	8	0
5.1	51	307	M	9	0
10.5	105	307	M	10	0
35.6667	856	307	M	8	1
30.75	738	307	M	4	1
30.6667	736	307	M	5	1
27.2917	655	307	M	9	1
24.0417	577	307	M	1	1
20.8333	500	307	M	3	1
16.6667	400	307	M	10	1
14.7083	353	307	M	2	1
14.4583	347	307	M	6	1
13.4167	322	307	M	7	1
43.8333	526	309	F	6	0
41.9167	503	309	F	9	0
40.75	489	309	F	10	0
38.8333	466	309	F	5	0
38.75	465	309	F	3	0
34	408	309	F	8	0
30.1667	362	309	F	7	0
27.75	333	309	F	4	0
10.25	123	309	F	2	0
3.5	42	309	F	1	0
64.7917	1555	309	F	3	1
62.4583	1499	309	F	10	1
59.9167	1438	309	F	4	1
57.5417	1381	309	F	5	1
53.7083	1289	309	F	7	1
51.375	1233	309	F	2	1
49.6667	1192	309	F	9	1
45.9167	1102	309	F	8	1
34.4583	827	309	F	6	1
16.7083	401	309	F	1	1
16	192	309	M	1	0
27.75	333	309	M	2	0
3.08333	37	309	M	3	0
12.0833	145	309	M	4	0
1.66667	20	309	M	5	0
6.16667	74	309	M	6	0
0.416667	5	309	M	7	0
0	0	309	M	8	0
3.5	42	309	M	9	0
2.25	27	309	M	10	0
67.9167	1630	309	M	4	1
62.2917	1495	309	M	5	1
46	1104	309	M	2	1
41.2083	989	309	M	3	1
32.5	780	309	M	1	1
26.0417	625	309	M	6	1
15.4583	371	309	M	8	1
6.125	147	309	M	7	1
4.5	108	309	M	9	1
2.04167	49	309	M	10	1
17.0833	205	310	F	8	0
16.75	201	310	F	5	0
12.25	147	310	F	9	0
8.5	102	310	F	1	0
8.16667	98	310	F	6	0
7.58333	91	310	F	3	0
7.08333	85	310	F	7	0
4.75	57	310	F	2	0
1.91667	23	310	F	4	0
79.1667	1900	310	F	3	1
58.6667	1408	310	F	1	1
57.7917	1387	310	F	2	1
55.4167	1330	310	F	8	1
54.5417	1309	310	F	9	1
54.125	1299	310	F	7	1
49.4167	1186	310	F	5	1
47.125	1131	310	F	6	1
40.3333	968	310	F	4	1
22.25	267	310	M	1	0
19.1667	230	310	M	2	0
30.3333	364	310	M	3	0
39.5	474	310	M	4	0
17.75	213	310	M	5	0
26.5	318	310	M	6	0
24.4167	293	310	M	7	0
23	276	310	M	8	0
96.4167	1157	310	M	9	0
23.5833	283	310	M	10	0
69.375	1665	310	M	8	1
67.0833	1610	310	M	5	1
62.0417	1489	310	M	2	1
58.75	1410	310	M	9	1
54.875	1317	310	M	4	1
52.2083	1253	310	M	3	1
47.5833	1142	310	M	1	1
43.9583	1055	310	M	10	1
35.4167	850	310	M	7	1
34.4167	826	310	M	6	1
42	504	313	F	3	0
40	480	313	F	8	0
33.8333	406	313	F	9	0
28.5833	343	313	F	5	0
26.3333	316	313	F	6	0
20.8333	250	313	F	10	0
17.8333	214	313	F	2	0
14.0833	169	313	F	4	0
4.91667	59	313	F	7	0
4.83333	58	313	F	1	0
31.6364	696	313	F	6	1
28.9091	636	313	F	5	1
25.9091	570	313	F	8	1
16.1364	355	313	F	9	1
12.6818	279	313	F	2	1
12.2727	270	313	F	3	1
8.68182	191	313	F	4	1
8.27273	182	313	F	10	1
2.95455	65	313	F	1	1
2.31818	51	313	F	7	1
30.1667	362	313	M	1	0
24.0833	289	313	M	2	0
47.3333	568	313	M	3	0
29.4167	353	313	M	4	0
66.3333	796	313	M	5	0
22.8333	274	313	M	6	0
22.25	267	313	M	7	0
31.5	378	313	M	8	0
9.58333	115	313	M	9	0
24.9167	299	313	M	10	0
70.8182	1558	313	M	5	1
58.1818	1280	313	M	3	1
54.4545	1198	313	M	1	1
40.3182	887	313	M	4	1
36.9545	813	313	M	10	1
33.7273	742	313	M	8	1
19.7727	435	313	M	9	1
8.72727	192	313	M	2	1
4.5	99	313	M	6	1
2.5	55	313	M	7	1
2.16667	26	315	F	8	0
2.08333	25	315	F	7	0
1.58333	19	315	F	4	0
1.5	18	315	F	6	0
1.41667	17	315	F	9	0
1.25	15	315	F	1	0
0.833333	10	315	F	3	0
0.583333	7	315	F	2	0
0.333333	4	315	F	5	0
0.25	3	315	F	10	0
21.8636	481	315	F	5	1
16.7727	369	315	F	7	1
16.3636	360	315	F	9	1
14.3636	316	315	F	6	1
12.5	275	315	F	4	1
12.3182	271	315	F	3	1
11.2727	248	315	F	2	1
10.8636	239	315	F	8	1
5.54545	122	315	F	1	1
0.545455	12	315	F	10	1
2.33333	28	315	M	1	0
0.333333	4	315	M	2	0
0.916667	11	315	M	3	0
7.25	87	315	M	4	0
3.25	39	315	M	5	0
1.16667	14	315	M	6	0
0.166667	2	315	M	7	0
1.5	18	315	M	8	0
0.75	9	315	M	9	0
26	572	315	M	4	1
25.4545	560	315	M	2	1
21.8636	481	315	M	9	1
18.1818	400	315	M	6	1
12.2727	270	315	M	1	1
12.2727	270	315	M	7	1
9.77273	215	315	M	5	1
9.68182	213	315	M	8	1
5.5	121	315	M	3	1
7.25	87	317	F	5	0
5.58333	67	317	F	9	0
3.25	39	317	F	10	0
3	36	317	F	7	0
2.5	30	317	F	1	0
1.33333	16	317	F	4	0
0.666667	8	317	F	2	0
0.25	3	317	F	6	0
0.166667	2	317	F	3	0
0	0	317	F	8	0
133.348	3067	317	F	9	1
131	3013	317	F	1	1
122.174	2810	317	F	2	1
106.391	2447	317	F	8	1
101.391	2332	317	F	4	1
96.3913	2217	317	F	5	1
92.3043	2123	317	F	10	1
90.3043	2077	317	F	3	1
87.6522	2016	317	F	7	1
56.6957	1304	317	F	6	1
5.33333	64	317	M	1	0
1.41667	17	317	M	2	0
7.66667	92	317	M	3	0
1.91667	23	317	M	4	0
1.33333	16	317	M	5	0
0.75	9	317	M	6	0
0.583333	7	317	M	7	0
0.833333	10	317	M	8	0
1.91667	23	317	M	9	0
1.75	21	317	M	10	0
130.217	2995	317	M	9	1
110.913	2551	317	M	4	1
110.261	2536	317	M	3	1
109.957	2529	317	M	5	1
101.13	2326	317	M	7	1
100.696	2316	317	M	2	1
98.7826	2272	317	M	10	1
81.2174	1868	317	M	6	1
62.1304	1429	317	M	1	1
52.1739	1200	317	M	8	1
10.3333	124	318	F	4	0
7.91667	95	318	F	7	0
6.66667	80	318	F	10	0
5.83333	70	318	F	8	0
5.33333	64	318	F	2	0
4	48	318	F	5	0
3.33333	40	318	F	9	0
2.5	30	318	F	3	0
2.16667	26	318	F	1	0
1.5	18	318	F	6	0
97.5	2340	318	F	4	1
91.5417	2197	318	F	3	1
81.4583	1955	318	F	7	1
79.7917	1915	318	F	8	1
78.7917	1891	318	F	2	1
71.125	1707	318	F	10	1
70.625	1695	318	F	9	1
68.0833	1634	318	F	1	1
63.2083	1517	318	F	5	1
52	1248	318	F	6	1
0	0	318	M	1	0
0	0	318	M	2	0
0.916667	11	318	M	3	0
0.75	9	318	M	4	0
0.0833333	1	318	M	5	0
4.5	54	318	M	6	0
0.0833333	1	318	M	7	0
18.4167	221	318	M	8	0
1.25	15	318	M	9	0
1	12	318	M	10	0
85.2083	2045	318	M	9	1
73.875	1773	318	M	3	1
67	1608	318	M	7	1
65.6667	1576	318	M	8	1
57.2083	1373	318	M	4	1
51.7083	1241	318	M	5	1
34.5	828	318	M	10	1
20.5833	494	318	M	6	1
9.25	222	318	M	1	1
1.16667	28	318	M	2	1
1.25	15	320	F	4	0
1.16667	14	320	F	1	0
0.5	6	320	F	2	0
0.333333	4	320	F	3	0
0.0833333	1	320	F	5	0
1.625	39	320	F	4	1
1.58333	38	320	F	3	1
1.375	33	320	F	2	1
1.29167	31	320	F	1	1
0.208333	5	320	F	5	1
20.1667	242	320	M	1	0
7.16667	86	320	M	2	0
0.583333	7	320	M	3	0
0	0	320	M	4	0
0.666667	8	320	M	5	0
11.75	282	320	M	1	1
5.20833	125	320	M	2	1
1.54167	37	320	M	3	1
0.833333	20	320	M	5	1
0	0	320	M	4	1
48.8182	537	321	F	2	0
33.9091	373	321	F	6	0
31.8182	350	321	F	8	0
31.4545	346	321	F	5	0
31.4545	346	321	F	9	0
30.4545	335	321	F	3	0
30.3636	334	321	F	4	0
29.3636	323	321	F	7	0
27.4545	302	321	F	1	0
26.0909	287	321	F	10	0
79.7391	1834	321	F	1	1
71.6087	1647	321	F	2	1
62.3913	1435	321	F	5	1
58.6957	1350	321	F	9	1
58.5217	1346	321	F	6	1
56.2609	1294	321	F	10	1
54.6087	1256	321	F	3	1
51.3913	1182	321	F	4	1
46.2174	1063	321	F	8	1
42.913	987	321	F	7	1
82.1818	904	321	M	1	0
77.5455	853	321	M	2	0
58.0909	639	321	M	3	0
19.2727	212	321	M	4	0
2.36364	26	321	M	5	0
184.091	2025	321	M	6	0
75.6364	832	321	M	7	0
106.545	1172	321	M	8	0
54.8182	603	321	M	9	0
124.727	1372	321	M	10	0
114.739	2639	321	M	1	1
95.0435	2186	321	M	9	1
81.2609	1869	321	M	8	1
78.8261	1813	321	M	7	1
75.4783	1736	321	M	2	1
73.5217	1691	321	M	6	1
73.3043	1686	321	M	10	1
68.4348	1574	321	M	4	1
58.087	1336	321	M	3	1
48.3043	1111	321	M	5	1
12.0833	145	324	F	7	0
9.16667	110	324	F	5	0
5.75	69	324	F	2	0
4.08333	49	324	F	1	0
1.41667	17	324	F	3	0
0.916667	11	324	F	4	0
0	0	324	F	6	0
78.3333	1880	324	F	7	1
65.9583	1583	324	F	4	1
50.4583	1211	324	F	2	1
43.5833	1046	324	F	1	1
42.75	1026	324	F	3	1
31.375	753	324	F	5	1
1.33333	32	324	F	6	1
41.5	498	324	M	1	0
41.5	498	324	M	2	0
43.9167	527	324	M	3	0
44.8333	538	324	M	4	0
43.75	525	324	M	5	0
25.4167	305	324	M	6	0
32.8333	394	324	M	7	0
79.2917	1903	324	M	3	1
59.0417	1417	324	M	7	1
59	1416	324	M	4	1
56.0417	1345	324	M	1	1
53.4167	1282	324	M	5	1
33.3333	800	324	M	6	1
25.6667	616	324	M	2	1
19.1667	230	332	F	1	0
13.5833	163	332	F	4	0
10.5	126	332	F	2	0
10	120	332	F	5	0
7	84	332	F	6	0
6.83333	82	332	F	8	0
5.5	66	332	F	7	0
2.25	27	332	F	3	0
29.3333	704	332	F	7	1
20.6667	496	332	F	8	1
18.4167	442	332	F	6	1
15.2917	367	332	F	1	1
12.9583	311	332	F	2	1
10.125	243	332	F	4	1
9.04167	217	332	F	3	1
6.25	150	332	F	5	1
39.4167	473	332	M	1	0
58.25	699	332	M	2	0
34.4167	413	332	M	3	0
57.75	693	332	M	4	0
63.9167	767	332	M	5	0
57.5	690	332	M	6	0
55.4167	665	332	M	7	0
62.75	753	332	M	8	0
96.125	2307	332	M	7	1
78.4583	1883	332	M	8	1
70.5833	1694	332	M	5	1
61.375	1473	332	M	2	1
54.4583	1307	332	M	6	1
47.9167	1150	332	M	4	1
36.2083	869	332	M	3	1
30.375	729	332	M	1	1
5.66667	68	335	F	4	0
1.75	21	335	F	8	0
1.16667	14	335	F	5	0
1.08333	13	335	F	3	0
1	12	335	F	1	0
0.5	6	335	F	6	0
0.5	6	335	F	7	0
0.5	6	335	F	10	0
0.166667	2	335	F	2	0
0.166667	2	335	F	9	0
9.29167	223	335	F	4	1
7.45833	179	335	F	3	1
3.20833	77	335	F	1	1
2.29167	55	335	F	6	1
2.20833	53	335	F	8	1
1.79167	43	335	F	5	1
1.75	42	335	F	9	1
1.08333	26	335	F	10	1
1.04167	25	335	F	2	1
0.833333	20	335	F	7	1
0.666667	8	335	M	1	0
11.5	138	335	M	2	0
13.9167	167	335	M	3	0
59.25	711	335	M	4	0
10.8333	130	335	M	5	0
1.75	21	335	M	6	0
27.1667	326	335	M	7	0
19	228	335	M	8	0
12.9167	155	335	M	9	0
4.75	57	335	M	10	0
41.7917	1003	335	M	4	1
10.6667	256	335	M	9	1
10.375	249	335	M	5	1
10.3333	248	335	M	8	1
10.1667	244	335	M	3	1
8.625	207	335	M	7	1
4.54167	109	335	M	10	1
2.75	66	335	M	2	1
1.25	30	335	M	1	1
0.125	3	335	M	6	1
18.75	225	336	F	9	0
10	120	336	F	10	0
7.41667	89	336	F	8	0
7.33333	88	336	F	6	0
6.83333	82	336	F	7	0
2.08333	25	336	F	3	0
1.41667	17	336	F	5	0
1	12	336	F	2	0
0.916667	11	336	F	4	0
0.5	6	336	F	1	0
20.1667	484	336	F	6	1
15	360	336	F	10	1
11.7917	283	336	F	9	1
10.0833	242	336	F	8	1
7	168	336	F	3	1
6.04167	145	336	F	5	1
5.875	141	336	F	1	1
5.25	126	336	F	7	1
4.41667	106	336	F	4	1
4.08333	98	336	F	2	1
18.3333	220	336	M	1	0
1	12	336	M	2	0
4.08333	49	336	M	3	0
2.91667	35	336	M	4	0
24.0833	289	336	M	5	0
10.5833	127	336	M	6	0
2.5	30	336	M	7	0
35.1667	844	336	M	1	1
30.7917	739	336	M	5	1
22.4583	539	336	M	2	1
19.9583	479	336	M	4	1
18.75	450	336	M	6	1
16.9167	406	336	M	7	1
3.375	81	336	M	3	1
32.3333	226.333	338	F	2	0
14.5357	101.75	338	F	6	0
11.5119	80.5833	338	F	4	0
11.0595	77.4167	338	F	3	0
6.92857	48.5	338	F	7	0
5.60714	39.25	338	F	8	0
4.71429	33	338	F	5	0
4.21429	29.5	338	F	9	0
2.70238	18.9167	338	F	10	0
1.67857	11.75	338	F	1	0
60.9748	1158.52	338	F	4	1
56.4027	1071.65	338	F	2	1
23.4508	445.565	338	F	1	1
15.7689	299.609	338	F	5	1
14.3478	272.609	338	F	6	1
9.26316	176	338	F	3	1
8.46224	160.783	338	F	9	1
7.28375	138.391	338	F	8	1
6.7849	128.913	338	F	7	1
5.73913	109.043	338	F	10	1
2.59687	20.775	338	M	1	0
25.6833	205.467	338	M	2	0
21.9524	153.667	338	M	3	0
3.46429	24.25	338	M	4	0
8.5119	59.5833	338	M	5	0
6.42857	45	338	M	6	0
60	420	338	M	7	0
14.8333	103.833	338	M	8	0
17.5	122.5	338	M	9	0
12.9881	90.9167	338	M	10	0
60.0847	1141.61	338	M	7	1
39.7071	754.435	338	M	5	1
29.8146	566.478	338	M	6	1
23.7918	452.043	338	M	3	1
14.9474	284	338	M	4	1
14.7735	280.696	338	M	8	1
14.3501	272.652	338	M	2	1
9.88101	187.739	338	M	9	1
7.47495	156.974	338	M	1	1
6.06865	115.304	338	M	10	1
40.6667	488	340	F	4	0
35.6667	428	340	F	2	0
29.0833	349	340	F	10	0
27.9167	335	340	F	1	0
23.5	282	340	F	3	0
22.3333	268	340	F	5	0
21.75	261	340	F	6	0
17.6667	212	340	F	9	0
14.6667	176	340	F	7	0
10.1667	122	340	F	8	0
22.375	537	340	F	6	1
21.1667	508	340	F	2	1
19.9167	478	340	F	10	1
16.5	396	340	F	4	1
16.2917	391	340	F	3	1
15.2083	365	340	F	5	1
13.7917	331	340	F	1	1
13.1667	316	340	F	7	1
6.33333	152	340	F	8	1
3.79167	91	340	F	9	1
95.9167	1151	340	M	1	0
108.333	1300	340	M	2	0
70.3333	844	340	M	3	0
26.5	318	340	M	4	0
55.5833	667	340	M	5	0
53.25	639	340	M	6	0
55.5	666	340	M	7	0
52.5	630	340	M	8	0
56	672	340	M	9	0
132.25	1587	340	M	10	0
19.25	462	340	M	7	1
18.3333	440	340	M	9	1
13.2083	317	340	M	5	1
[truncated: 3,727 more rows]
